# Supplementary material for: Antimicrobial Activity of Gemini Surfactants with Azapolymethylene Spacer
Source: PubMed Central journal article supplement (PMC7571221; doi:10.3390/molecules25184054), 2020-09-04

## SUPPLEMENTARY MATERIAL

### Preparation of compound (1)

To a solution of *N,N,N',N',N''*-pentamethyl-1,4,7-triazaheptane (0.01 mol; 2g) in acetonitrile (50 mL) was added *n*-iodooctane (0.02 mol; 5.52g). The reaction mixture was heated under reflux for 32 hours. The solvent was evaporated under reduced pressure and the residue was dried over P<sub>4</sub>O<sub>10</sub> and then crystallized from acetone. White solid, mp: 156–158 °C, yield 43%.

<sup>1</sup>H NMR (403 MHz, CDCl<sub>3</sub>): δ 3.98-3.84 (m, 4H), 3.71-3.56 (m, 4H), 3.43 (s, 12H), 3.25-3.11 (m, 4H), 2.55 (s, 3H), 1.73-1.67 (m, 4H), 1.48-1.19 (m, 24H), 0.88 (t, 6H). <sup>13</sup>C NMR (101 MHz, CDCl<sub>3</sub>) δ 65.45, 61.18, 51.51, 50.93, 43.05, 31.49, 29.05, 28.90, 26.04, 22.81, 22.42, 22.19, 13.94. ESI-MS (*m/z*) 200 [C<sub>25</sub>H<sub>57</sub>N<sub>3</sub>]<sup>2+</sup>

### Preparation of compound (2)

To a solution of *N,N,N',N',N''*-pentamethyl-1,4,7-triazaheptane (0.02 mol; 3.75 g) in acetonitrile (50 mL) was added *n*-iodododecane (0.05 mol; 13 g). The reaction mixture was heated under reflux for 23 hours. The solvent was evaporated under reduced pressure and the residue was dried over P<sub>4</sub>O<sub>10</sub> and then crystallized from acetone. White solid, mp: 202–204 °C, yield 48%.

<sup>1</sup>H NMR (403 MHz, CDCl<sub>3</sub>): δ 3.98-3.85 (m, 4H), 3.70-3.56 (m, 4H), 3.43 (s, 12H), 3.25-3.12 (m, 4H), 2.55 (s, 3H), 1.84-1.67 (m, 4H), 1.48-1.18 (m, 32 H), 0.88 (t, 6H). <sup>13</sup>C NMR (101 MHz, CDCl<sub>3</sub>) 65.52, 61.25, 51.54, 50.95, 43.11, 31.71, 29.33, 29.30, 29.18, 29.13, 26.10, 22.86, 22.52, 14.00. Elemental analysis found (calc) %C 48.58 (49.08); %H 9.68 (9.23); %N 5.48 (5.92)

### Preparation of compound (3)

To a solution of *N,N,N',N',N''*-pentamethyl-1,4,7-triazaheptane (0.02 mol; 3.75 g) in acetonitrile (50 mL) was added *n*-iodododecane (0.05 mol; 13 g). The reaction mixture was heated under reflux for 23 hours. The solvent was evaporated under reduced pressure and the residue was dried over P<sub>4</sub>O<sub>10</sub> and then crystallized from acetone. White solid, mp: 211–212 °C, yield 46%.

<sup>1</sup>H NMR (403 MHz, CDCl<sub>3</sub>): δ 3.99-3.86 (m, 4H), 3.68-3.55 (m, 4H), 3.43 (s, 12H), 3.24-3.12 (m, 4H), 2.55 (s, 3H), 1.83-1.68 (m, 4H), 1.48-1.18 (m, 40 H), 0.88 (t, 6H). <sup>13</sup>C NMR (101 MHz, CDCl<sub>3</sub>) 65.54, 61.27, 51.54, 50.95, 43.12, 26.12, 22.87, 14.01 ESI-MS (*m/z*) 255 [C<sub>33</sub>H<sub>73</sub>N<sub>3</sub>]<sup>2+</sup>

### Preparation of compound (4)

To a solution of *N,N,N',N',N''*-pentamethyl-1,4,7-triazaheptane (0.01 mol; 2 g) in acetonitrile (50 mL) was added *n*-iodotetradecane (0.03 mol; 9.22 g). The reaction mixture was heated under reflux for 4 hours. The solvent was evaporated under reduced pressure and the residue was dried over P<sub>4</sub>O<sub>10</sub> and then crystallized from acetone. White solid, mp: 209-210 °C, yield 85%.

**<sup>1</sup>H NMR (403 MHz, CDCl<sub>3</sub>):** δ 3.99-3.86 (m, 4H), 3.68-3.54 (m, 4H), 3.42 (s, 12H), 3.25-3.13 (m, 4H), 2.55 (s, 3H), 1.85-1.66 (m, 4H), 1.49-1.17 (m, 48 H), 0.88 (t, 6H). **<sup>13</sup>C NMR (101 MHz, CDCl<sub>3</sub>):** 65.57, 61.31, 51.56, 50.97, 43.13, 26.14, 22.89, 14.00 **Elemental analysis found (calc)** %C 53.43 (54.01); %H 10.38 (10.04); %N 4.78 (5.11)

#### **Preparation of compound (5)**

To a solution of *N,N,N',N',N''*-pentamethyl-1,4,7-triazaheptane (0.01 mol; 2 g) in acetonitrile (50 mL) was added *n*-iodohexadecane (0.02 mol; 7.5 g). The reaction mixture was heated under reflux for 4 hours. The solvent was evaporated under reduced pressure and the residue was dried over P<sub>4</sub>O<sub>10</sub> and then crystallized from acetonitrile. White solid, mp: 215-217 °C, yield 42%.

**<sup>1</sup>H NMR (403 MHz, CDCl<sub>3</sub>):** δ 3.98-3.86 (m, 4H), 3.68-3.55 (m, 4H), 3.42 (s, 12H), 3.24-3.13 (m, 4H), 2.56 (s, 3H), 1.83-1.68 (m, 4H), 1.49-1.17 (m, 56 H), 0.88 (t, 6H). **<sup>13</sup>C NMR (101 MHz, CDCl<sub>3</sub>):** 65.57, 61.31, 51.55, 50.97, 43.15, 26.14, 22.89, 14.02. **Elemental analysis found (calc)** %C 55.37 (56.09); %H 10.12 (10.18); %N 4.45 (4.79)

#### **Preparation of compound (6)**

To a solution of *N,N,N',N',N''*-pentamethyl-1,4,7-triazaheptane (0.01 mol; 2 g) in acetonitrile (50 mL) was added *n*-iodooctadecane (0.02 mol; 8 g). The reaction mixture was heated under reflux for 2 hours. The solvent was evaporated under reduced pressure and the residue was dried over P<sub>4</sub>O<sub>10</sub> and then crystallized from acetone:acetonitrile (1:1). White solid, mp: 209–211 °C, yield 65%

**<sup>1</sup>H NMR (403 MHz, CDCl<sub>3</sub>):** δ 3.98-3.87 (m, 4H), 3.68-3.56 (m, 4H), 3.42 (s, 12H), 3.26-3.13 (m, 4H), 2.56 (s, 3H), 1.83-1.67 (m, 4H), 1.49-1.17 (m, 64 H), 0.88 (t, 6H). **<sup>13</sup>C NMR (101 MHz, CDCl<sub>3</sub>):** δ 65.58, 61.32, 51.56, 50.97, 43.15, 31.81, 29.62, 29.56, 29.46, 29.37, 29.25, 26.15, 22.89, 22.58, 14.02. **Elemental analysis found (calc)** %C 58.09 (57.86); %H 10.99 (10.47); %N 4.24 (4.50)

#### **Preparation of compound (7)**

To a solution of *N,N,N',N',N''*-pentamethyl-1,4,7-triazaheptane (0.02 mol; 3.75 g) in acetonitrile (50 mL) was added *n*-bromodecane (0.04 mol; 8.3 mL). The reaction mixture was heated under reflux for 60 hours. The solvent was evaporated under reduced pressure and the residue was dried over P<sub>4</sub>O<sub>10</sub> and then crystallized from acetonitrile. White solid, mp 218-220 °C, yield 48%.

**<sup>1</sup>H NMR (403 MHz, CDCl<sub>3</sub>):** δ 4.00-3.91 (m, 4H), 3.65-3.55 (m, 4H), 3.43 (s, 12H), 3.21-3.13 (m, 4H), 2.53 (s, 3H), 1.79-1.66 (m, 4H), 1.44-1.18 (m, 32 H), 0.88 (t, 6H).

**<sup>13</sup>C NMR (101 MHz, CDCl<sub>3</sub>):** δ 65.39, 61.92, 61.22, 51.21, 50.77, 48.52, 45.13, 43.09, 31.76, 29.36, 29.33, 29.23, 29.17, 26.23, 22.86, 22.58, 14.04. **Elemental analysis found (calc)** %C 56.61 (56.58); %H 10.62 (10.64); %N 6.82 (6.83)

### Preparation of compound (8)

To a solution of *N,N,N',N',N''*-pentamethyl-1,4,7-triazaheptane (0.02 mol; 3.75 g) in acetonitrile (50 mL) was added *n*-bromododecane (0.04 mol; 9.3 mL). The reaction mixture was heated under reflux for 12 hours. The solvent was evaporated under reduced pressure and the residue was dried over P<sub>4</sub>O<sub>10</sub> and then crystallized from acetonitrile. White solid, mp 225-227 °C, yield 42%.

<sup>1</sup>H NMR (403 MHz, TFA-d): δ 4.00-3.90 (m, 4H), 3.65-3.53 (m, 4H), 3.41 (s, 12H), 3.23-3.11 (m, 4H), 2.53 (s, 3H), 1.80-1.65 (m, 4H), 1.45-1.19 (m, 40 H), 0.88 (t, 6H). <sup>13</sup>C NMR (101 MHz, TFA-d) δ 66.08, 62.06, 53.62, 52.30, 49.48, 43.57, 34.02, 32.04, 31.94, 31.79, 31.61, 31.32, 28.23, 24.66, 15.82. **Elemental analysis found (calc)** %C 58.22 (58.22); %H 11.12 (10.96); %N 6.21 (6.17)

### Preparation of compound (9)

To a solution of *N,N,N',N',N''*-pentamethyl-1,4,7-triazaheptane (0.02 mol; 3.75 g) in acetonitrile (50 mL) was added *n*-bromotetradecane (0.04 mol; 12 mL). The reaction mixture was heated under reflux for 10 hours. The solvent was evaporated under reduced pressure and the residue was dried over P<sub>4</sub>O<sub>10</sub> and then crystallized from acetonitrile. White solid, mp 229-231 °C, yield 55%.

<sup>1</sup>H NMR (403 MHz, CDCl<sub>3</sub>): δ 4.03-3.92 (m, 4H), 3.68-3.54 (m, 4H), 3.42 (s, 12H), 3.23-3.12 (m, 4H), 2.54 (s, 3H), 1.81-1.65 (m, 4H), 1.46-1.19 (m, 48 H), 0.88 (t, 6H).

<sup>13</sup>C NMR (101 MHz, CDCl<sub>3</sub>) δ 65.35, 61.54, 61.13, 51.15, 50.74, 48.29, 44.79, 43.05, 31.79, 29.56, 29.53, 29.49, 29.39, 29.31, 29.23, 26.20, 22.83, 22.56, 14.00. **Elemental analysis found (calc)** %C 59.65 (59.58); %H 11.14 (11.22); %N 5.71 (5.63)

### Preparation of compound (10)

To a solution of *N,N,N',N',N''*-pentamethyl-1,4,7-triazaheptane (0.02 mol; 3.75 g) in acetonitrile (50 mL) was added *n*-bromoheksadecane (0.04 mol; 12.4 mL). The reaction mixture was heated under reflux for 8 hours. The solvent was evaporated under reduced pressure and the residue was dried over P<sub>4</sub>O<sub>10</sub> and then crystallized from acetonitrile. White solid, mp 223-225 °C, yield 49%.

<sup>1</sup>H NMR (403 MHz, CDCl<sub>3</sub>): δ 4.02-3.92 (m, 4H), 3.68-3.56 (m, 4H), 3.42 (s, 12H), 3.24-3.11 (m, 4H), 2.54 (s, 3H), 1.81-1.64 (m, 4H), 1.46-1.19 (m, 56 H), 0.88 (t, 6H). <sup>13</sup>C NMR (101 MHz, CDCl<sub>3</sub>) δ 65.39, 61.93, 61.23, 51.16, 50.81, 48.51, 45.12, 43.09, 31.82, 29.60, 29.56, 29.53, 29.42, 29.34, 29.26, 29.13, 26.22, 22.85, 22.59, 14.03. **Elemental analysis found (calc)** %C 62.28 (62.10); %H 10.71 (11.44); %N 5.30 (5.30)

### Preparation of compound (11)

To a solution of *N,N,N',N',N''*-pentamethyl-1,4,7-triazaheptane (0.02 mol; 3.75 g) in acetonitrile (50 mL) was added *n*-bromooctadecane (0.04 mol; 13.4 mL). The reaction mixture was heated under reflux for 2 hours. The solvent was evaporated under reduced pressure and the residue was dried over P<sub>4</sub>O<sub>10</sub> and then crystallized from acetone: acetonitrile (1:2). White solid, mp 256-259 °C, yield 59%.

<sup>1</sup>H NMR (403 MHz, CDCl<sub>3</sub>): δ 4.02-3.92 (m, 4H), 3.67-3.55 (m, 4H), 3.42 (s, 12H), 3.22-3.12 (m, 4H), 2.53 (s, 3H), 1.79-1.65 (m, 4H), 1.45-1.19 (m, 64 H), 0.88 (t, 6H).

<sup>13</sup>C NMR (101 MHz, CDCl<sub>3</sub>) δ 65.39, 61.22, 51.17, 50.79, 48.51, 43.10, 31.82, 29.61, 29.58, 29.57, 29.54, 29.43, 29.34, 29.26, 29.25, 26.23, 22.86, 22.59, 14.03. **Elemental analysis found (calc)** %C 63.71 (63.65); %H 11.83 (11.63); %N 4.91 (4.95)

### Preparation of compound (12)

To a solution of 4-aza-1,7-heptane-bis(*N,N*-dimethyl-*N*-otadecylammonium) dibromide (0.005 mol; 4.27 g) in acetonitrile (20 mL) was added *n*-bromooctane (0.006 mol; 1.16 g) and sodium carbonate (0.006 mol; 0.64 g). The reaction mixture was heated under reflux for 28 hours. The solvent was evaporated under reduced pressure and the residue was dried over P<sub>4</sub>O<sub>10</sub> and then crystallized from acetonitrile. White solid, mp 67-68 °C, yield 55%.

<sup>1</sup>H NMR (403 MHz, CDCl<sub>3</sub>): δ 3.93 (m, 4H), 3.38 (m, 12H), 2.72 (t, 4H), 2.52 (m, 4H), 3.43 (m, 6H), 1.74 (m, 6H), 1.35 (m, 12H), 1.26 (m, 54H), 0.87 (t, 9H).

<sup>13</sup>C NMR (101 MHz, CDCl<sub>3</sub>) δ 65.64, 64.73, 62.72, 61.87, 54.17, 51.08, 50.81, 49.73, 44.51, 31.87, 31.77, 31.60, 30.43, 29.67, 29.6, 29.59, , 29.48, 29.41, 29.32, , 29.10, 27.36, 26.30, 25.38, 22.84, 22.64, 20.14, 14.08. **ESI-MS** (*m/z*) 403 [C<sub>54</sub>H<sub>115</sub>N<sub>3</sub>]<sup>2+</sup>, 347 [C<sub>46</sub>H<sub>98</sub>N<sub>3</sub>]<sup>2+</sup>

### Preparation of compound (13)

To a solution of 4-aza-1,7-heptane-bis(*N,N*-dimethyl-*N*-otadecylammonium) dibromide (0.005 mol; 4.27 g) in acetonitrile (20 mL) was added *n*-bromodecane (0.006 mol; 1.33 g) and sodium carbonate (0.006 mol; 0.64 g). The reaction mixture was heated under reflux for 24 hours. The solvent was evaporated under reduced pressure and the residue was dried over P<sub>4</sub>O<sub>10</sub> and then crystallized from acetonitrile. White solid, mp 65-66 °C, yield 60%.

<sup>1</sup>H NMR (403 MHz, CDCl<sub>3</sub>): δ 3.92 (m, 4H), 3.38 (m, 12H), 2.71 (t, 4H), 2.30 (m, 4H), 3.42 (m, 6H), 1.74 (m, 6H), 1.35 (m, 12H), 1.26 (m, 58H), 0.88 (t, 9H). <sup>13</sup>C NMR (101 MHz, CDCl<sub>3</sub>) δ 64.78, 62.60, 54.23, 51.13, 50.82, 49.70, 31.87, 29.67, 29.48, 29.14, 29.31, 29.24, 27.32, 26.30, 25.36, 22.84, 22.64, 20.05, 14.07. **ESI-MS** (*m/z*) 417 [C<sub>56</sub>H<sub>119</sub>N<sub>3</sub>]<sup>2+</sup>, 347 [C<sub>46</sub>H<sub>98</sub>N<sub>3</sub>]<sup>2+</sup>

### Preparation of compound (14)

To a solution of 4-aza-1,7-heptane-bis(*N,N*-dimethyl-*N*-otadecylammonium) dibromide (0.005 mol; 4.27 g) in acetonitrile (20 mL) was added *n*-bromododecane (0.006 mol; 1.49 g) and sodium carbonate (0.006 mol; 0.64 g). The reaction mixture was heated under reflux for 22 hours. The solvent was evaporated under reduced pressure and the residue was dried over P<sub>4</sub>O<sub>10</sub> and then crystallized from acetonitrile. White solid, mp 62–63 °C, yield 72 %.

<sup>1</sup>H NMR (403 MHz, CDCl<sub>3</sub>): δ 3.93 (m, 4H), 3.39 (s, 12H), 2.77 (t, 4H), 2.22 (m, 4H), 3.45 (m, 6H), 1.74 (m, 6H), 1.35 (m, 12H), 1.26 (m, 62H), 0.88 (t, 9H). <sup>13</sup>C NMR (101 MHz, CDCl<sub>3</sub>) δ 64.85, 62.48, 54.28, 51.09, 50.79, 49.54, 31.87, 29.67, 29.61, 29.48, 29.41, 29.31, 29.24, 27.27, 26.28, 25.30, 22.83, 22.63, 19.89, 14.08.

### Preparation of compound (15)

To a solution of 4-aza-1,7-heptane-bis(*N,N*-dimethyl-*N*-otadecylammonium) dibromide (0.005 mol; 4.27 g) in acetonitrile (20 mL) was added *n*-bromotetradecane (0.005 mol; 1.67 g) and sodium carbonate (0.006 mol; 0.64 g). The reaction mixture was heated under reflux for 20 hours. The solvent was evaporated under reduced pressure and the residue was dried over P<sub>4</sub>O<sub>10</sub> and then crystallized from acetonitrile. White solid, mp 60–61 °C, yield 75%.

<sup>1</sup>H NMR (403 MHz, CDCl<sub>3</sub>): δ 3.91 (m, 4H), 3.42 (s, 12H), 2.81 (t, 4H), 2.07 (m, 4H), 3.47 (m, 6H), 1.74 (m, 6H), 1.34 (m, 12H), 1.26 (m, 64H), 0.88 (t, 9H). <sup>13</sup>C NMR (101 MHz, CDCl<sub>3</sub>) δ 64.47, 63.00, 53.96, 51.06, 50.03, 31.87, 29.67, 29.61, 29.48, 29.40, 29.31, 29.24, 27.48, 26.30, 25.56, 22.84, 22.64, 20.54, 14.08. ESI-MS (*m/z*) 445 [C<sub>60</sub>H<sub>127</sub>N<sub>3</sub>]<sup>2+</sup>, 347 [C<sub>46</sub>H<sub>98</sub>N<sub>3</sub>]<sup>2+</sup>

### Preparation of compound (16)

To a solution of 4-aza-1,7-heptane-bis(*N,N*-dimethyl-*N*-otadecylammonium) dibromide (0.006 mol; 5.12 g) in acetonitrile (20 mL) was added *n*-bromoheksadecane (0.005 mol; 2.19 g) and sodium carbonate (0.006 mol; 0.64 g). The reaction mixture was heated under reflux for 16 hours. The solvent was evaporated under reduced pressure and the residue was dried over P<sub>4</sub>O<sub>10</sub> and then crystallized from acetonitrile. White solid, mp 57–59 °C, yield 78%.

<sup>1</sup>H NMR (403 MHz, CDCl<sub>3</sub>): 3.91 (m, 4H), 3.41 (s, 12H), 2.78 (t, 4H), 2.04 (m, 4H), 3.41 (m, 6H), 1.73 (m, 6H), 1.34 (m, 12H), 1.25 (m, 66H), 0.88 (t, 9H) δ <sup>13</sup>C NMR (101 MHz, CDCl<sub>3</sub>) δ 64.39, 63.07, 53.92, 51.03, 50.08, 31.87, 29.66, 29.61, 29.46, 29.39, 29.31, 29.24, 27.49, 26.30, 25.58, 22.83, 22.63, 20.60, 14.07. ESI-MS (*m/z*) 459 [C<sub>62</sub>H<sub>135</sub>N<sub>3</sub>]<sup>2+</sup>, 347 [C<sub>46</sub>H<sub>98</sub>N<sub>3</sub>]<sup>2+</sup>

### Preparation of compound (17)

To a solution of 4-aza-1,7-heptane-bis(*N,N*-dimethyl-*N*-dodecylammonium) diiodide (0.005 mol; 4 g) in acetonitrile (20 mL) was added *n*-iodododecane (0.015 mol; 4.45 g) and sodium carbonate (0.006 mol; 0.64 g). The reaction mixture was heated under reflux for 20 hours. The solvent was evaporated under reduced pressure and the residue was dried over P<sub>4</sub>O<sub>10</sub> and then crystallized from acetonitrile. White solid, mp 110-111 °C, yield 60%.

<sup>1</sup>H NMR (403 MHz, CDCl<sub>3</sub>): δ 4.031-3.902 (m, 4H), 3.57-3.47 (m, 4H), 3.87 (s, 12H), 2.67-2.64 (t, 4H), 2.47-2.44 (t, 2H), 1.40 (s, 6H), 1.26 (s, 50 H), 0.87 (t, 9H). <sup>13</sup>C NMR (101 MHz, CDCl<sub>3</sub>) δ 64.38, 63.55, 53.29, 51.12, 50.21, 31.76, 29.48, 27.60, 26.17, 25.49, 22.86, 22.55, 21.12, 13.99.

### Preparation of compound (18)

To a solution of 4-aza-1,7-heptane-bis(*N,N*-dimethyl-*N*-hexadecylammonium) dibromide (0.005 mol; 4 g) in acetonitrile (20 mL) was added *n*-iodohexadecane (0.015 mol; 5.30 g) and sodium carbonate (0.006 mol; 0.64 g). The reaction mixture was heated under reflux for 22 hours. The solvent was evaporated under reduced pressure and the residue was dried over P<sub>4</sub>O<sub>10</sub> and then crystallized from acetonitrile. White solid, mp 65-67 °C, yield 65%.

<sup>1</sup>H NMR (403 MHz, CDCl<sub>3</sub>): δ 4.04-3.98 (m, 4H), 3.50-3.45 (m, 4H), 3.38 (s, 12H), 2.67 (s, 4H), 2.47-2.44 (t, 2H), 2.02 (s, 4H), 1.75 (s, 6H), 1.36 (s, 6 H), 1.25 (s, 36H), 0.88 (s, 9H) <sup>13</sup>C NMR (101 MHz, CDCl<sub>3</sub>) δ 64.42, 63.68, 53.21, 51.09, 50.31, 31.85, 29.63, 29.59, 29.55, 27.65, 26.22, 25.38, 22.89, 22.61, 21.17. ESI-MS (*m/z*) 347 [C<sub>46</sub>H<sub>99</sub>N<sub>3</sub>]<sup>2+</sup>, 440 [C<sub>28</sub>H<sub>62</sub>N<sub>3</sub>]<sup>+</sup>

### Preparation of compound (19)

To a solution of 3,3'-Iminobis(*N,N*-dimethylpropylamine) (0.021 mol; 4 g) in acetonitrile (10 mL) was added *n*-iodododecane (0.042 mol; 18.7 g) and sodium carbonate (0.021 mol; 2.23 g). The reaction mixture was heated under reflux for 28 hours. The solvent was evaporated under reduced pressure and the residue was dried over P<sub>4</sub>O<sub>10</sub> and then crystallized from acetonitrile. White solid, mp 174-176 °C, yield 85%.

<sup>1</sup>H NMR (403 MHz, CDCl<sub>3</sub>): δ 3.59-3.44 (m, 4H), 3.42-3.36 (m, 8H), 3.19 (s, 12H), 2.52 (m, 4H), 1.87 (m, 4H), 1.46 (m, 8H), 1.35 (s, 12 H), 0.91 (t, 6H), <sup>13</sup>C NMR (101 MHz, CDCl<sub>3</sub>) δ 66.10, 60.89, 50.36, 45.52, 31.50-29.91, 22.50, 19.96. 12.43

### Preparation of compound (20)

To a solution of 3,3'-Iminobis(*N,N*-dimethylpropylamine) (0.021 mol; 4 g) in acetonitrile (10 mL) was added *n*-iodohexadecane (0.042 mol; 14.9 g) and sodium carbonate (0.021 mol; 2.23 g). The reaction mixture was heated under reflux for 12 hours. The solvent was evaporated under reduced pressure and the residue was dried over P<sub>4</sub>O<sub>10</sub> and then crystallized from acetonitrile. White solid, mp 149-150 °C, yield 82%.

<sup>1</sup>H NMR (403 MHz, CDCl<sub>3</sub>): δ 3.57-3.49 (m, 4H), 3.46-3.35 (m, 8H), 3.19 (s, 12H), 2.54 (m, 4H), 1.87 (m, 4H), 1.46 (m, 8H), 1.35 (s, 28 H), 0.92 (t, 6H). <sup>13</sup>C NMR (101 MHz, CDCl<sub>3</sub>) δ 66.11, 60.89, 50.37, 45.52, 31.57-29.01, 22.51, 19.98. 12.14 ESI-MS (*m/z*) 323 [C<sub>42</sub>H<sub>99</sub>N<sub>3</sub>]<sup>2+</sup>

### Preparation of compound (21)

To a solution of 3,3'-Iminobis(*N,N*-dimethylpropylamine) (0.021 mol; 4 g) in acetonitrile (10 mL) was added *n*-iodooctadecane (0.042 mol; 15,96 g) and sodium carbonate (0.021 mol; 2.23 g). The reaction mixture was heated under reflux for 7 hours. The solvent was evaporated under reduced pressure and the residue was dried over P<sub>4</sub>O<sub>10</sub> and then crystallized from acetonitrile. White solid, mp 127-128 °C, yield 80%.

<sup>1</sup>H-NMR (403 MHz, TFA-*d*): δ 3.57-3.55 (m, 4H), 3.46-3.42 (m, 8H), 3.19 (s, 12H), 2.54 (m, 4H), 1.87 (m, 4H), 1.46 (m, 8H), 1.35 (s, 28 H), 0.92 (t, 6H). <sup>13</sup>C NMR (101 MHz, TFA-*d*) δ 66.08, 60.89, 50.89, 45.53, 31.59-25.71, 22.13, 19.94. 12.46 ESI-MS (*m/z*) 347 [C<sub>46</sub>H<sub>99</sub>N<sub>3</sub>]<sup>2+</sup>, 440 [C<sub>28</sub>H<sub>62</sub>N<sub>3</sub>]

# Compound 1 <sup>1</sup>H NMR

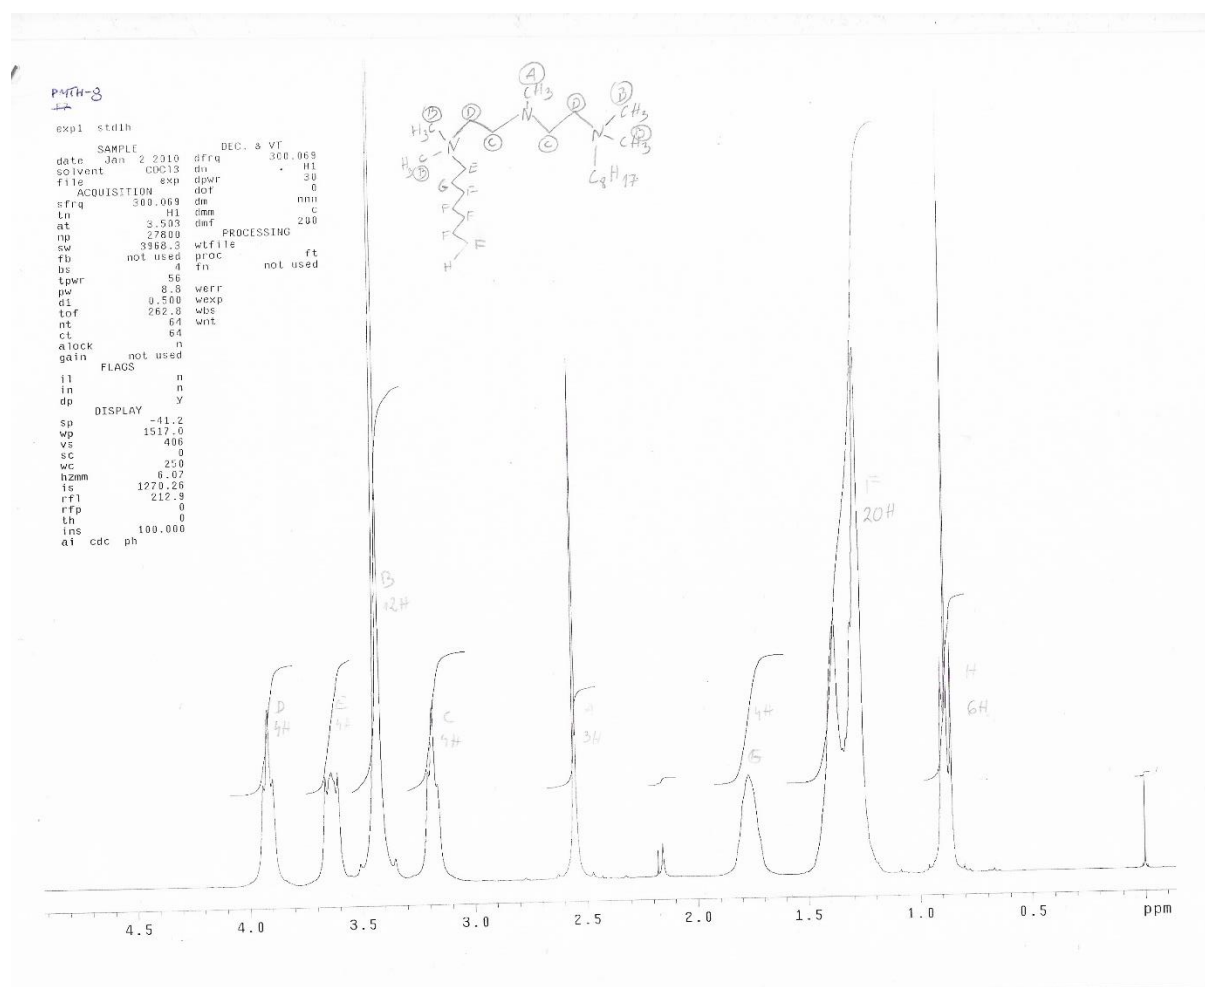



# Compound 1 <sup>13</sup>C NMR

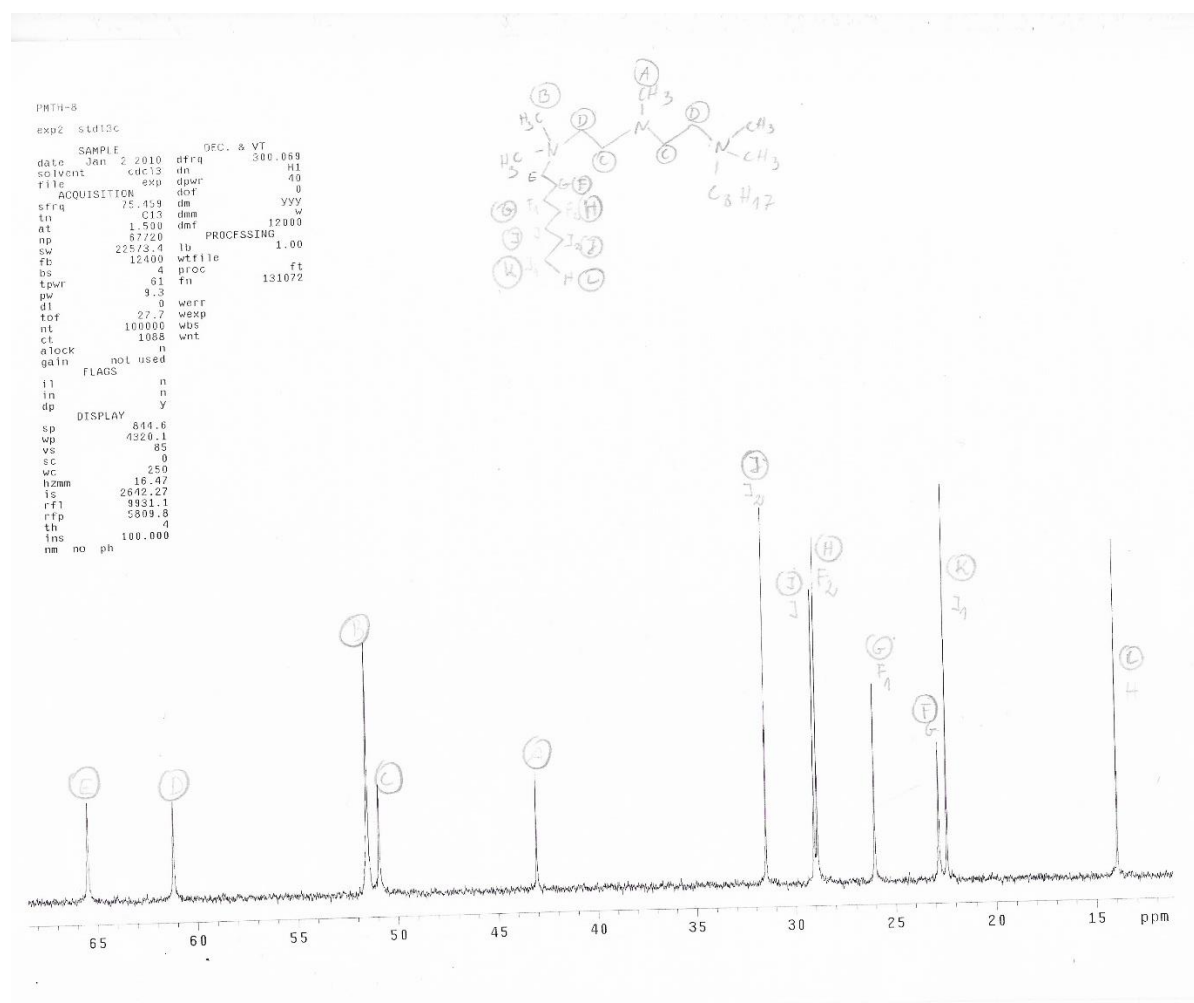

# Compound 2 <sup>1</sup>H NMR

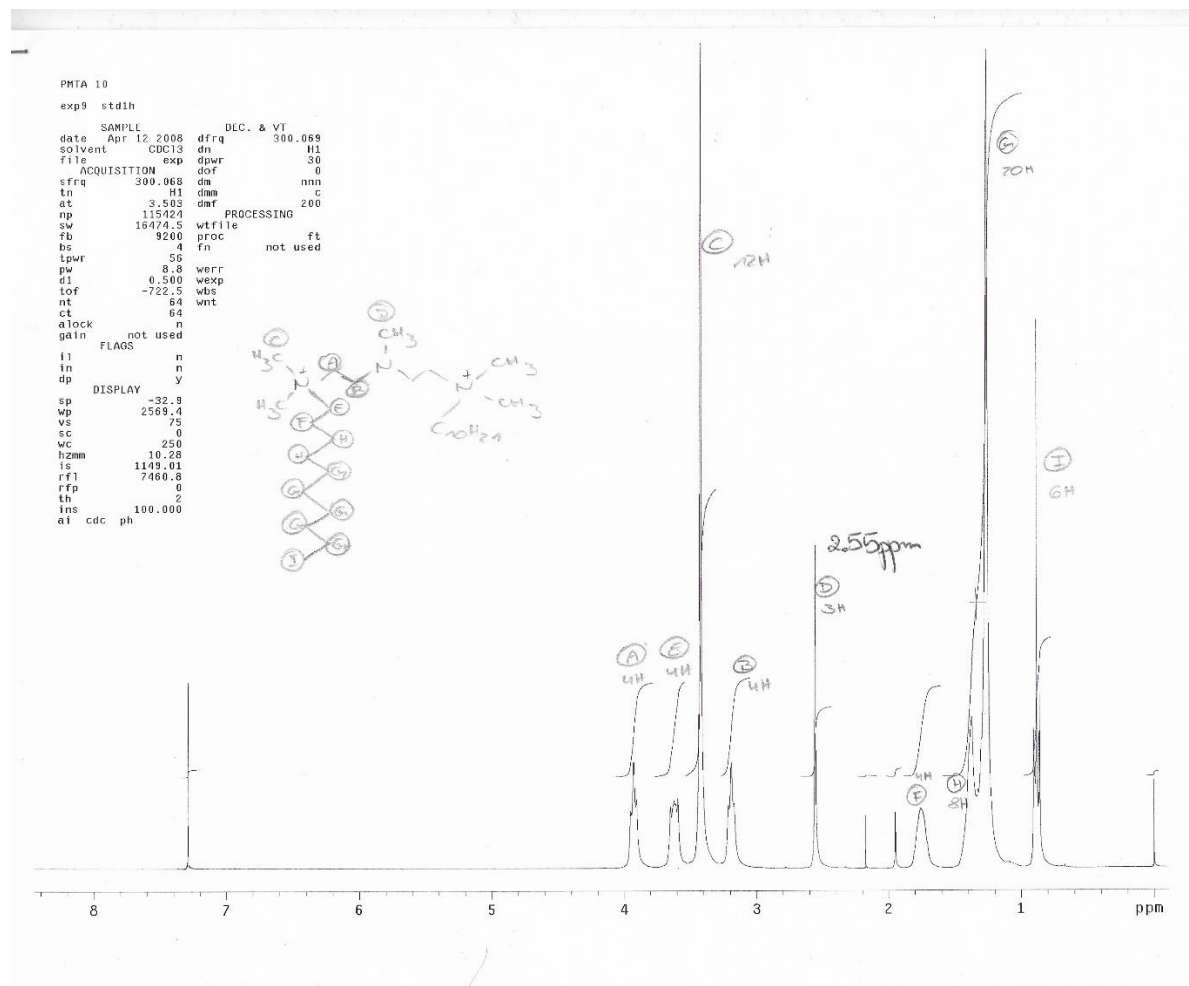

# Compound 2 <sup>13</sup>C NMR

PMTA 10  
 exp2 std13c

|                  |               |
|------------------|---------------|
| SAMPLE           | DEC. & VT     |
| date Apr 16 2008 | dfreq 300.076 |
| solvent cdc13    | dn 11         |
| file exp         | dpwr 41       |
| ACQUISITION      | doz 0         |
| sfrq 75.461      | dm yyv        |
| in C13           | dim w         |
| ak 1.500         | dmf 12000     |
| np 89002         | PROCESSING    |
| sw 23000.0       | lb 1.00       |
| Fb 12000         | vtfile        |
| bs 1             | proc          |
| tpwr 55          | fn            |
| pw 6.0           | ft 131072     |
| d1 0             | werr          |
| tof 0            | wexp          |
| nt 1e+07         | was           |
| ct 1120          | wnt           |
| alock n          |               |
| gain 28          |               |

  

|         |         |
|---------|---------|
| il      | n       |
| in      | n       |
| dp      | Y       |
| DISPLAY |         |
| sp      | 182.3   |
| mp      | 8965.6  |
| vs      | 125     |
| sc      | 0       |
| vc      | 250     |
| hzmm    | 35.86   |
| ls      | 1e+09   |
| rf1     | 10167.2 |
| rpf     | 5809.9  |
| th      | 5       |
| ins     | 100.000 |
| nm      | no ph   |

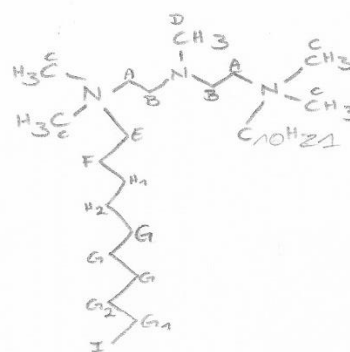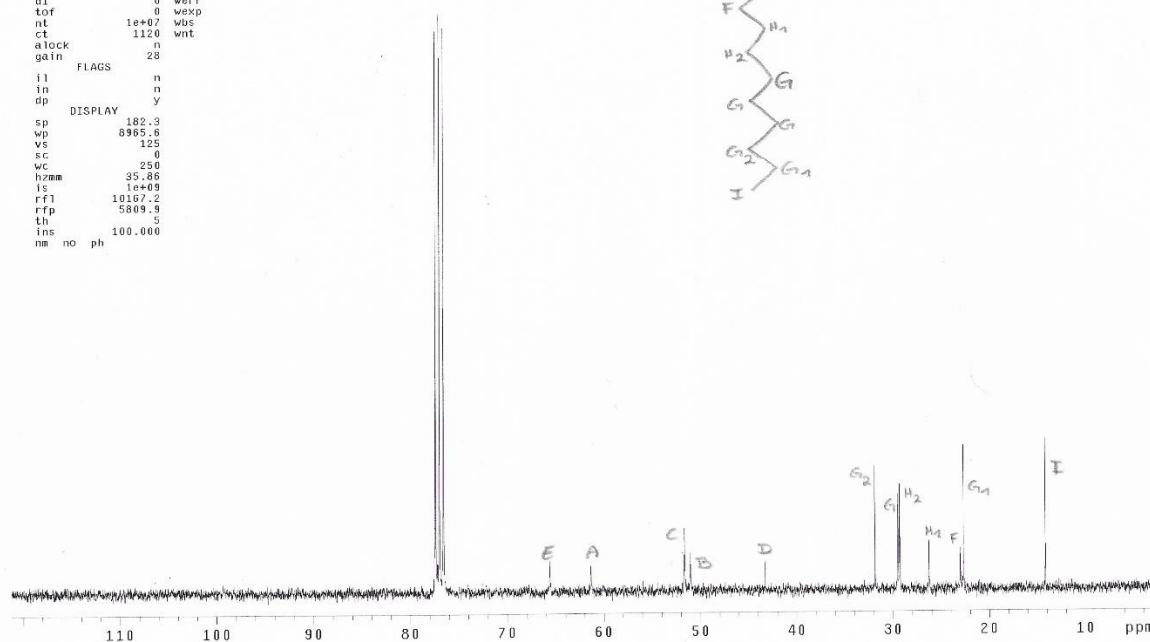

# Compound 3 <sup>1</sup>H NMR

M. Popiela\_PMTA 12-2

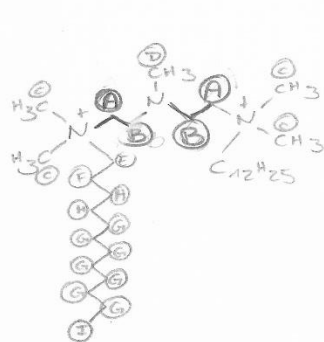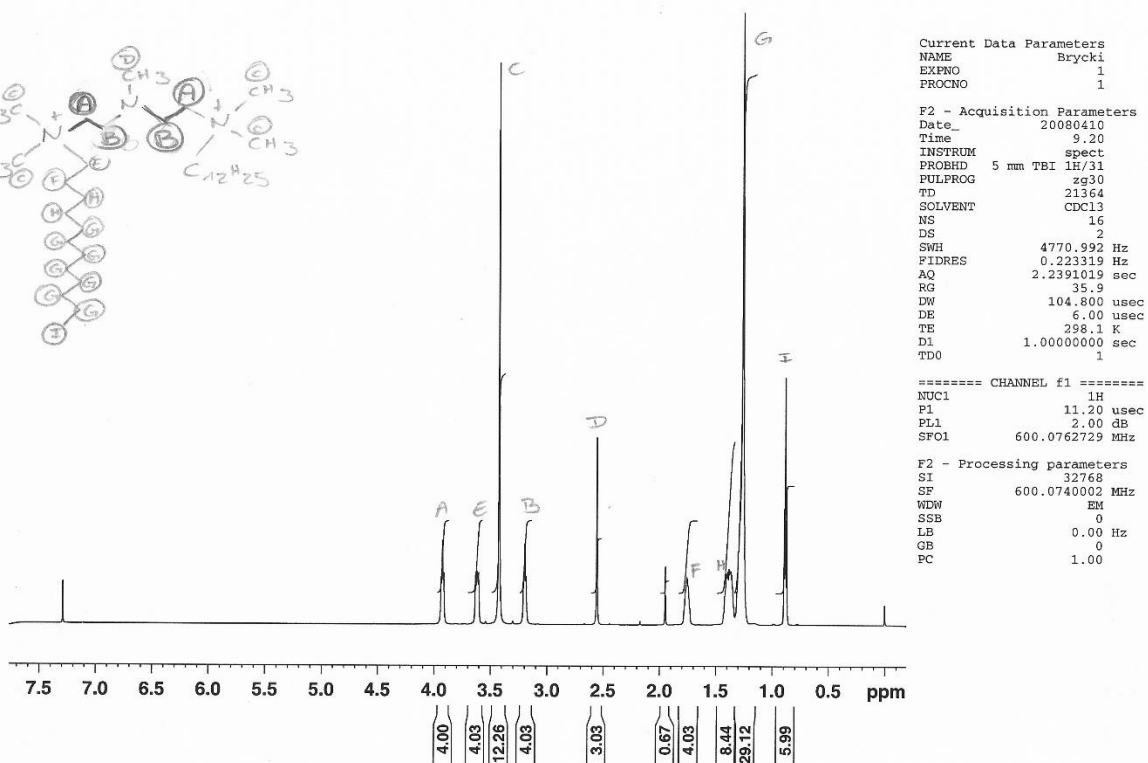

Current Data Parameters  
 NAME Brycki  
 EXPNO 1  
 PROCNO 1

F2 - Acquisition Parameters  
 Date\_ 20080410  
 Time 9.20  
 INSTRUM spect  
 PROBHD 5 mm TBI 1H/31  
 PULPROG zg30  
 TD 21364  
 SOLVENT CDCl3  
 NS 16  
 DS 2  
 SWH 4770.992 Hz  
 FIDRES 0.223319 Hz  
 AQ 2.2391019 sec  
 RG 35.9  
 DW 104.800 usec  
 DE 6.00 usec  
 TE 298.1 K  
 D1 1.0000000 sec  
 TD0 1

===== CHANNEL f1 =====  
 NUC1 1H  
 P1 11.20 usec  
 PL1 2.00 dB  
 SFO1 600.0762729 MHz

F2 - Processing parameters  
 SI 32768  
 SF 600.0740002 MHz  
 WDW EM  
 SSB 0  
 LB 0.00 Hz  
 GB 0  
 PC 1.00

# Compound 3 <sup>13</sup>C NMR

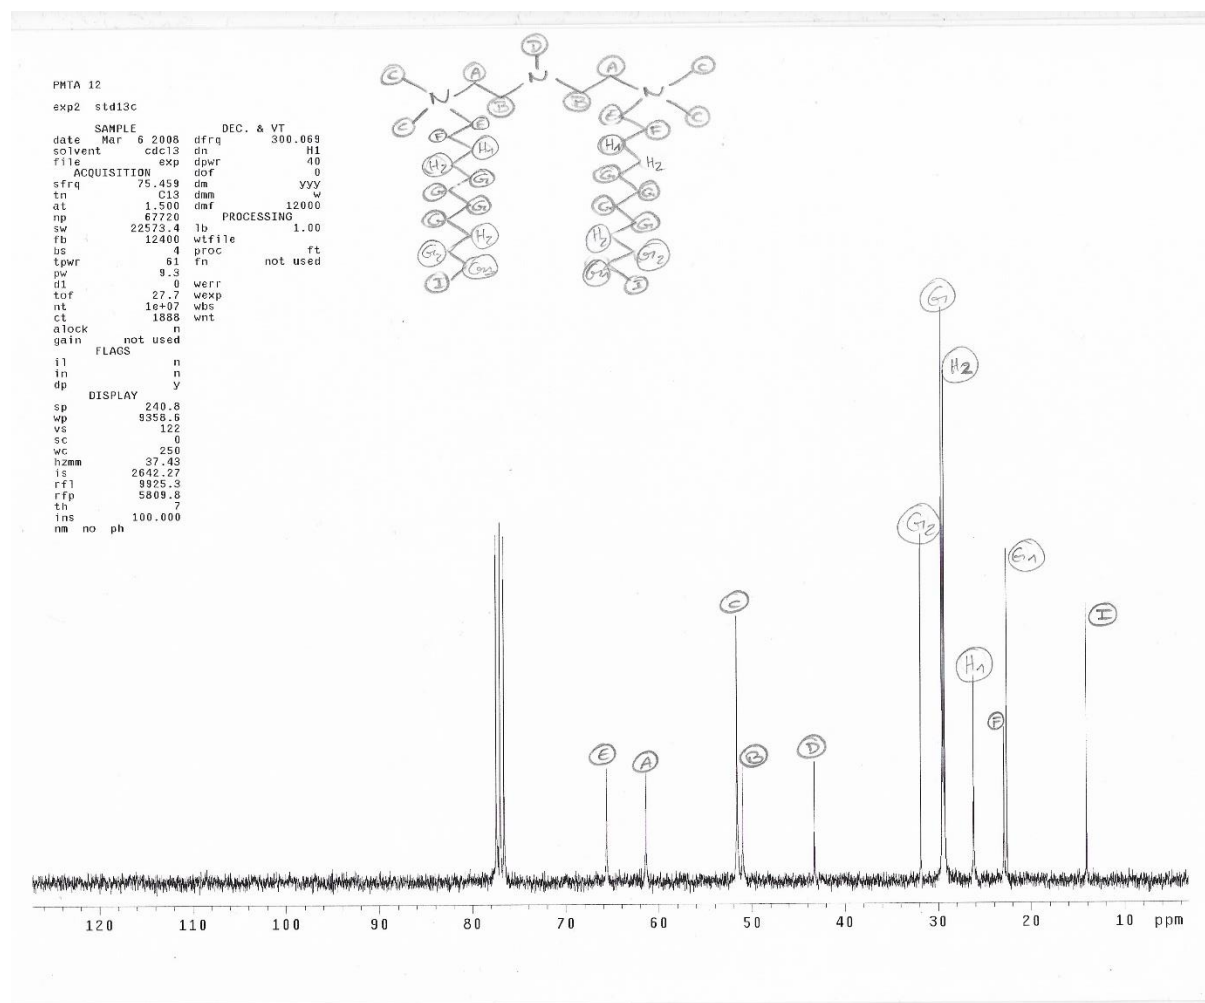

# Compound 4 <sup>1</sup>H NMR

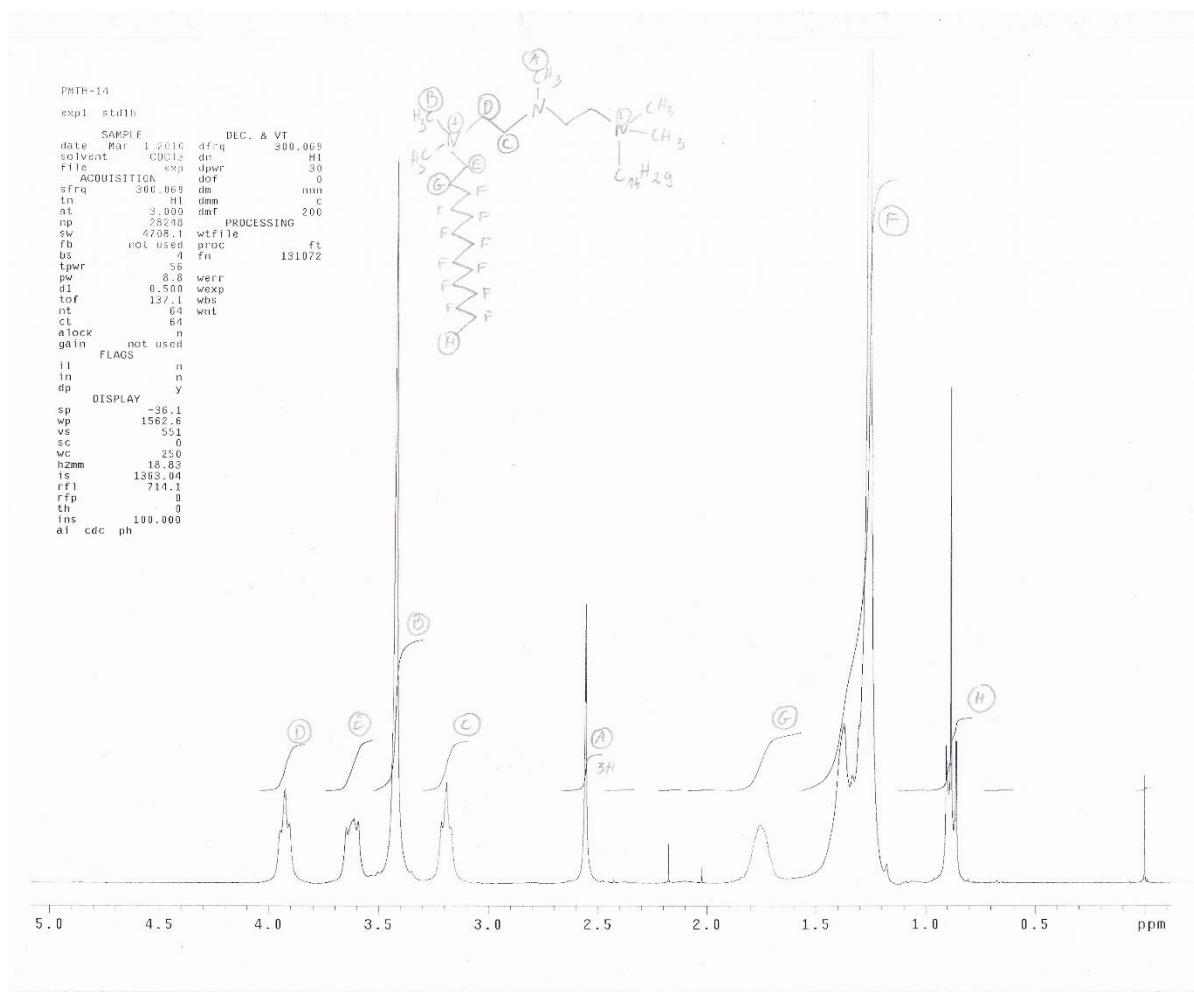

# Compound 4 <sup>13</sup>C NMR

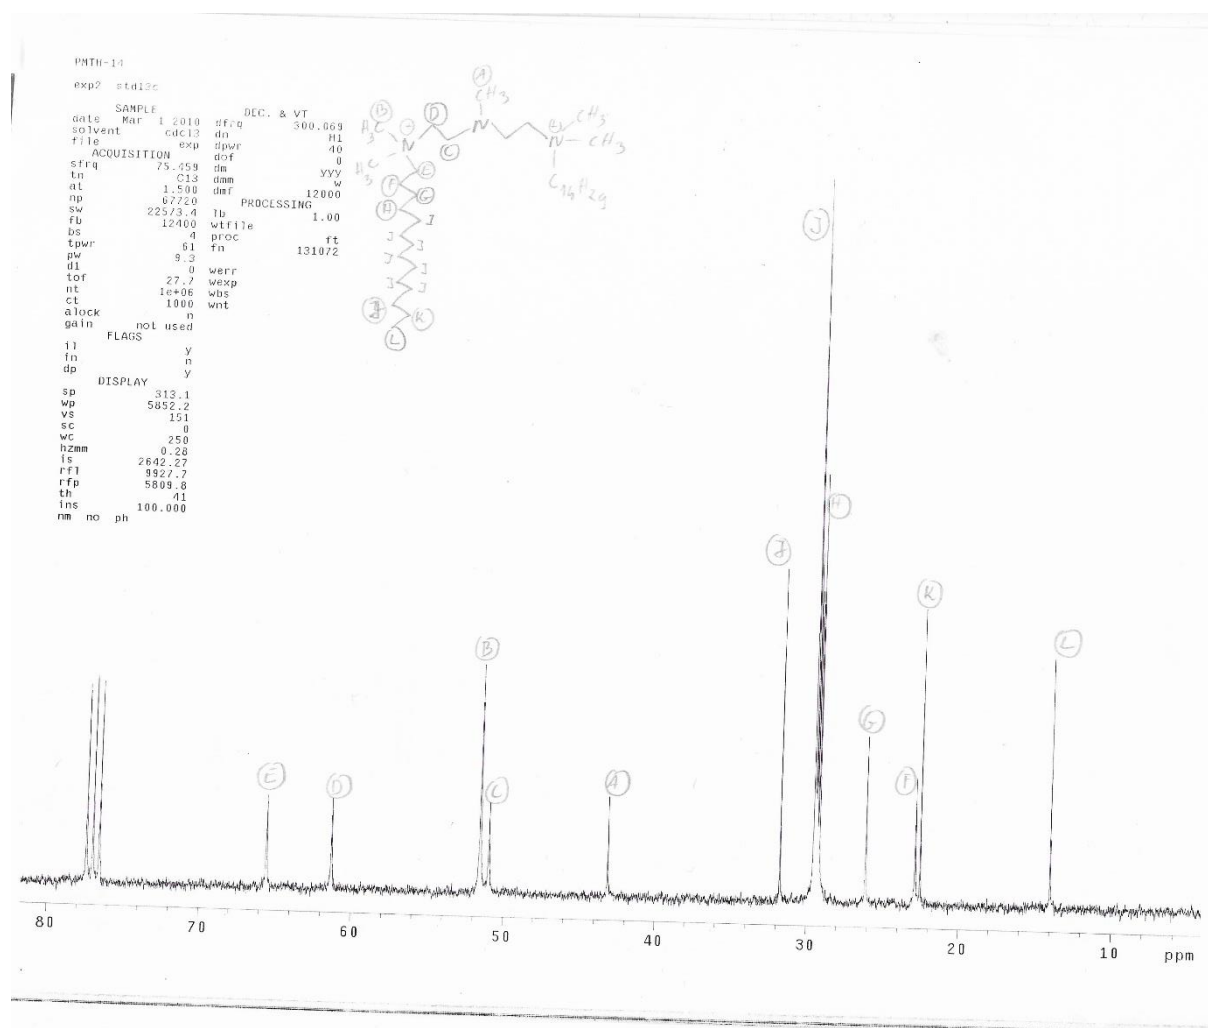

# Compound 5 <sup>1</sup>H NMR

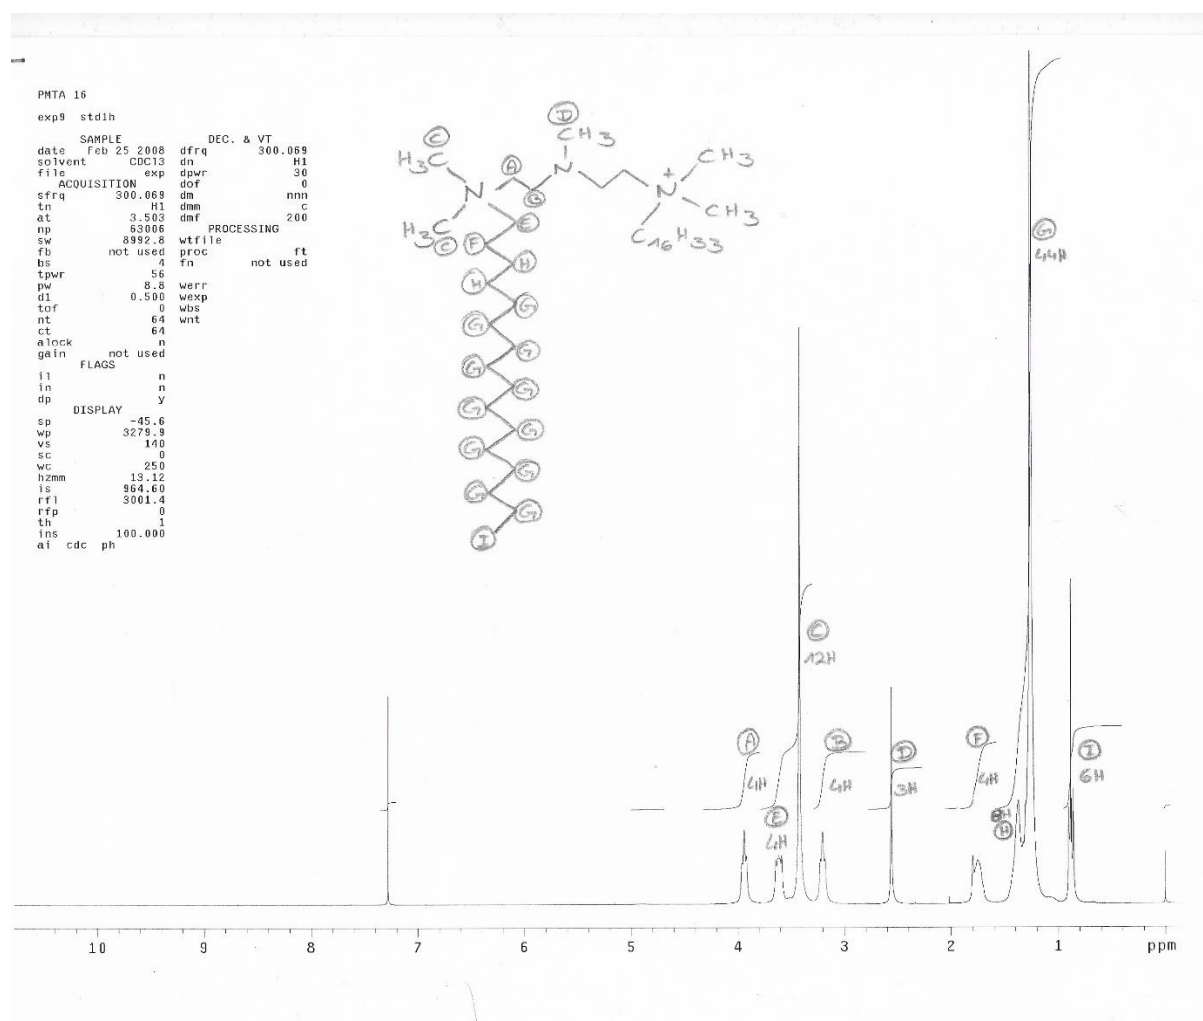



# Compound 5 <sup>13</sup>C NMR

```

PMTA 16
exp3 std13c
SAMPLE
date Feb 28 2008 dfrq DEC. & VT 300.076
solvent cdc13 dn H1
file /export/home/~ dpwr 41
data/rozne/CPMTA16- dof 0
fid dn yyy
ACQUISITION dnm w
sfrq 75.461 dmf 12000
tn C13 PROCESSING
at 1.500 lb 1.00
np 63002 wfile
sw 23000.0 proc ft
fb 12800 fn 131072
bs 4
tpwr 55 werr
pw 6.0 wexp
di 0 wbs
tof 0 wnt
nt 1e+07
ct 2768
alock n
gain not used
FLAGS
il n
in n
dp y
DISPLAY
sp -489.4
wp 14271.3
vs 140
sc 9
wc 250
hzmm 57.09
is 14102.27
rf1 10164.4
rfp 5809.9
th 6
ins 100.000
nm no ph
    
```

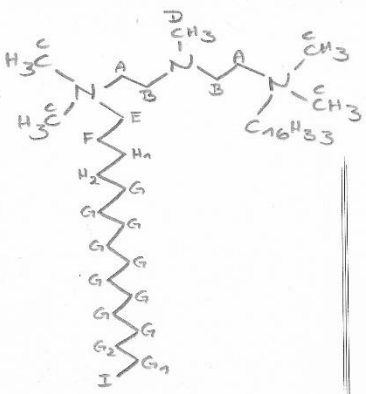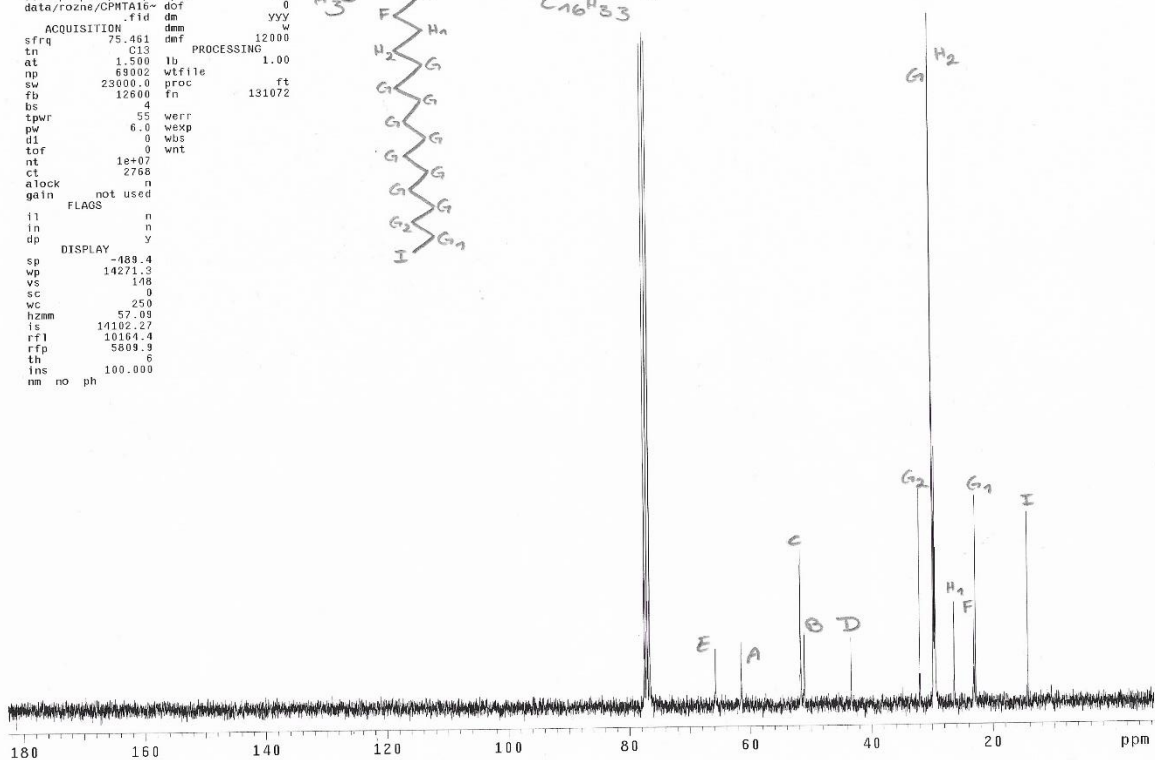

# Compound 6 <sup>1</sup>H NMR

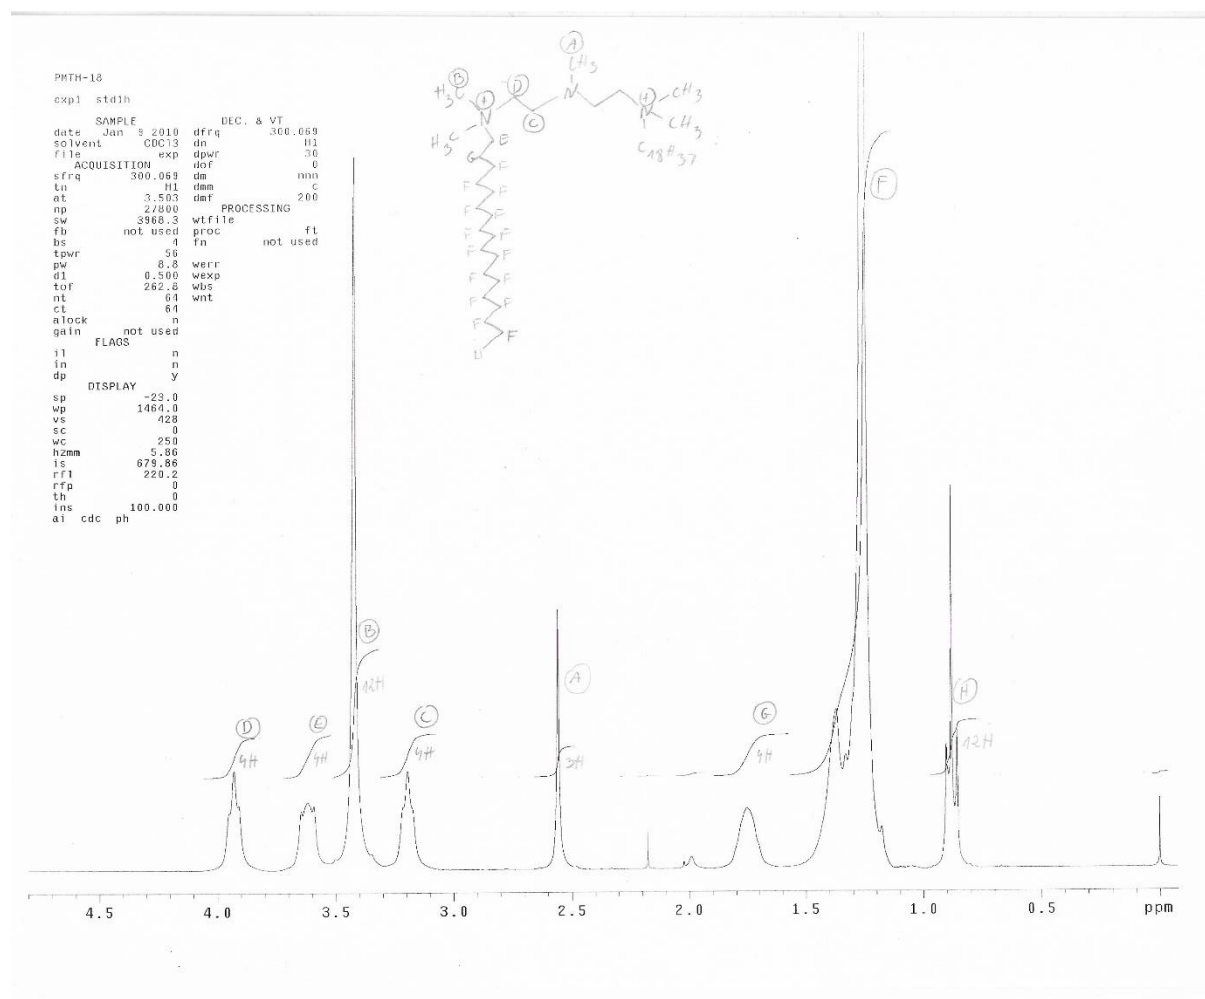

# Compound 6 <sup>13</sup>C NMR

PMTH-18

exp2 std13c

SAMPLED DEC. & VI  
 date Jan 9 2010 dfrq 300.059  
 solvent cdcl3 dn H1  
 file ACQUISITION exp dpwr 40  
 sfrq 75.458 dm YYY  
 tn C13 dnm V  
 at 1.500 dmf 12000  
 np 67720 PROCESsing 1.00  
 sw 22573.4 lb wtfile  
 fb 12400 proc ft  
 bs 4 fn 131072  
 tpwr 61  
 pw 9.3  
 dl 0 werr  
 lof 27.7 wexp  
 nt 100000 wbs  
 ct 1000 wnt  
 a lock not used  
 gain not used  
 FLAGS n  
 in n  
 dp y  
 DISPLAY 694.4  
 sp 4581.5  
 wp 174  
 vs 0  
 sc 0  
 wc 250  
 hzmm 0.66  
 is 2642.27  
 rfi 9927.0  
 rfp 5809.8  
 th 6  
 ins 100.000  
 nm no ph

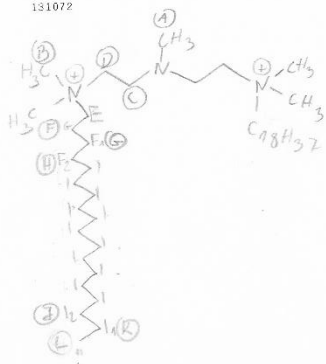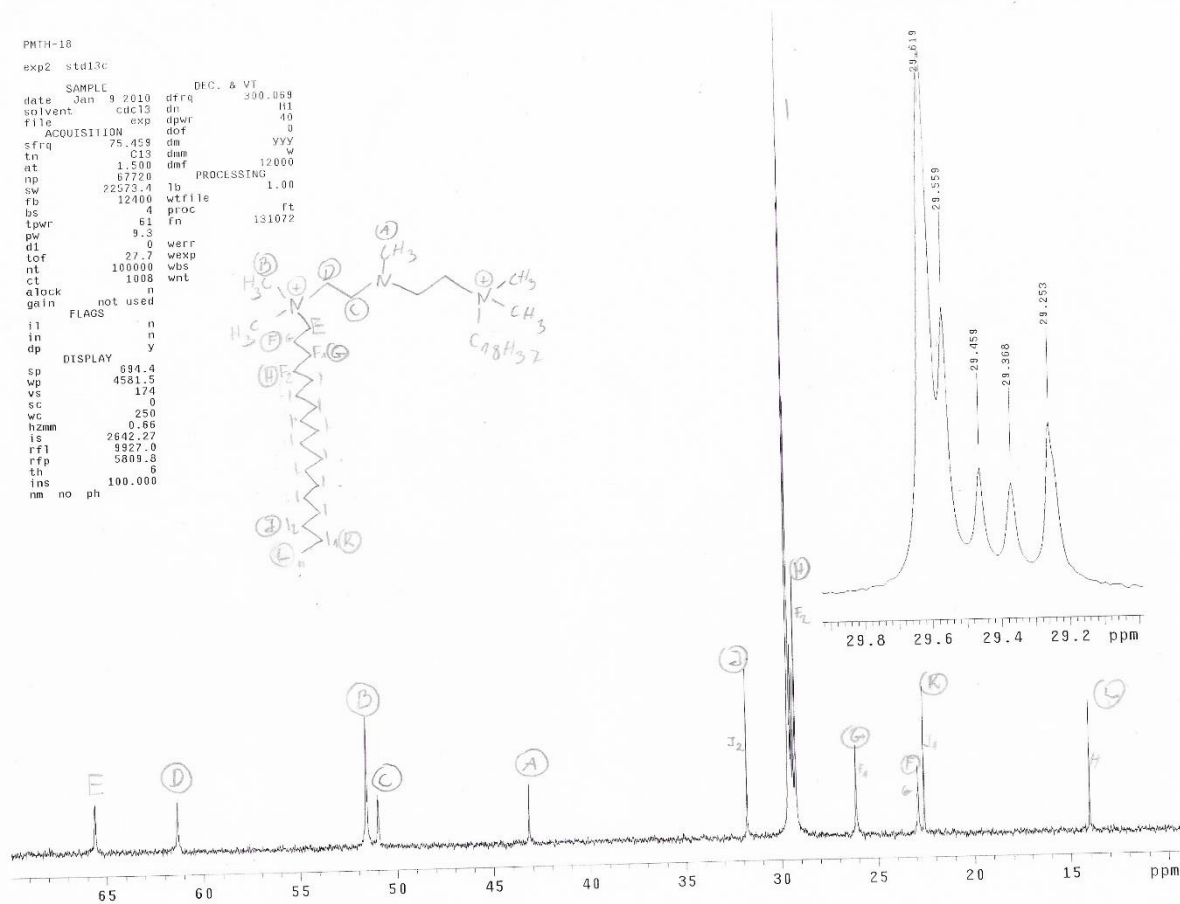

# Compound 7 <sup>1</sup>H NMR

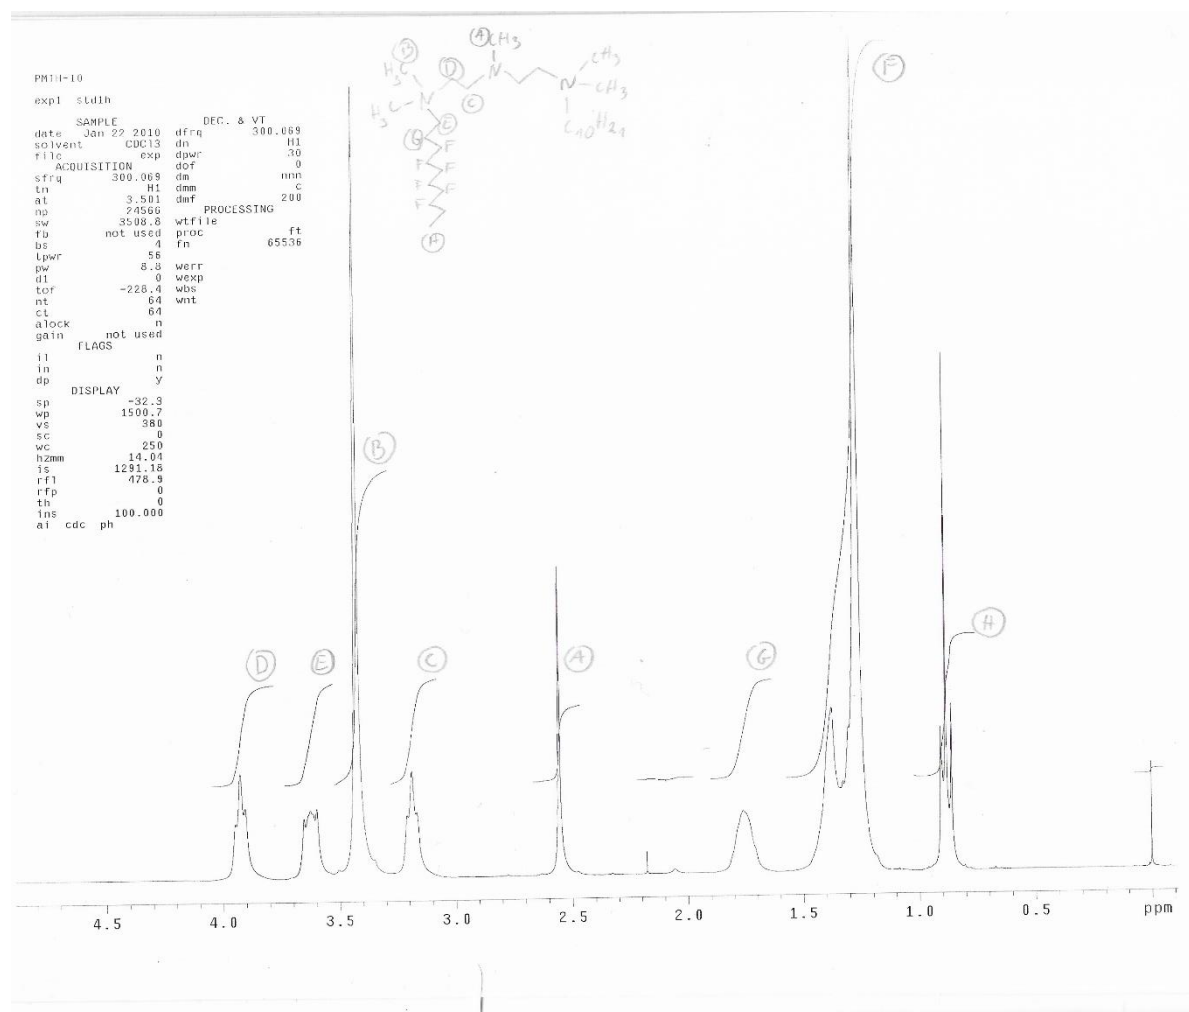

# Compound 7 <sup>13</sup>C NMR

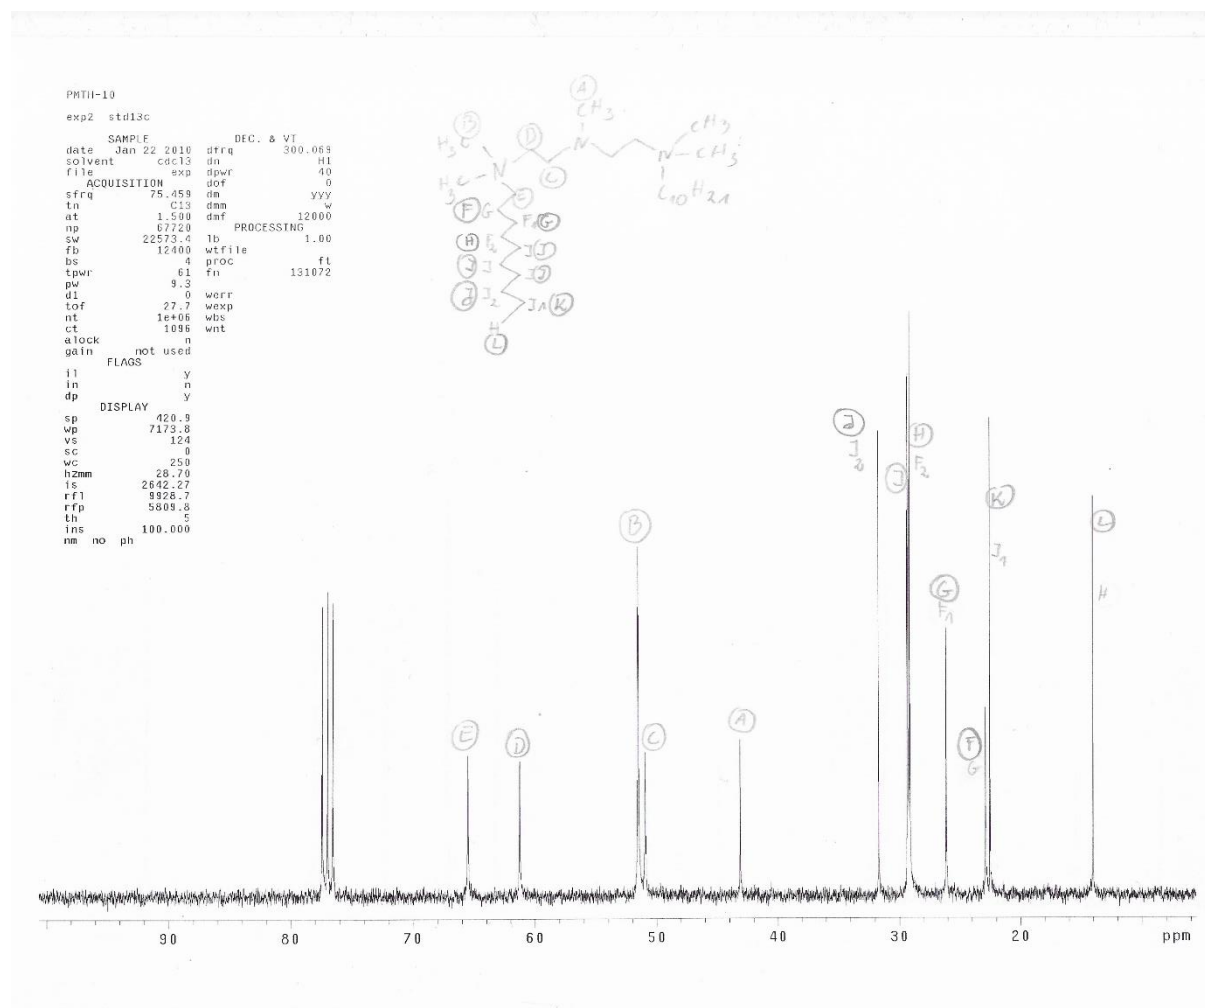

# Compound 8 <sup>1</sup>H NMR

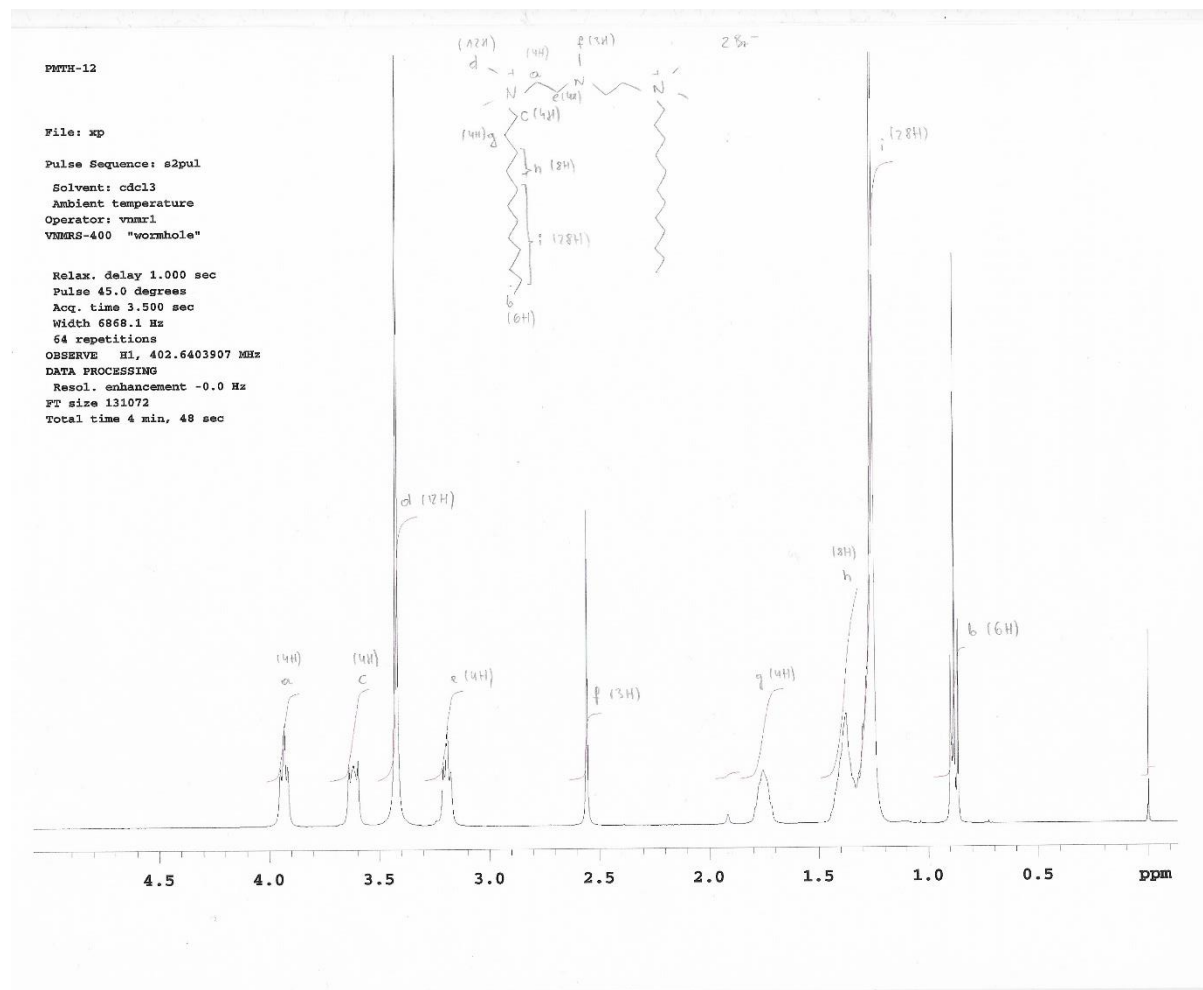

# Compound 8 <sup>13</sup>C NMR

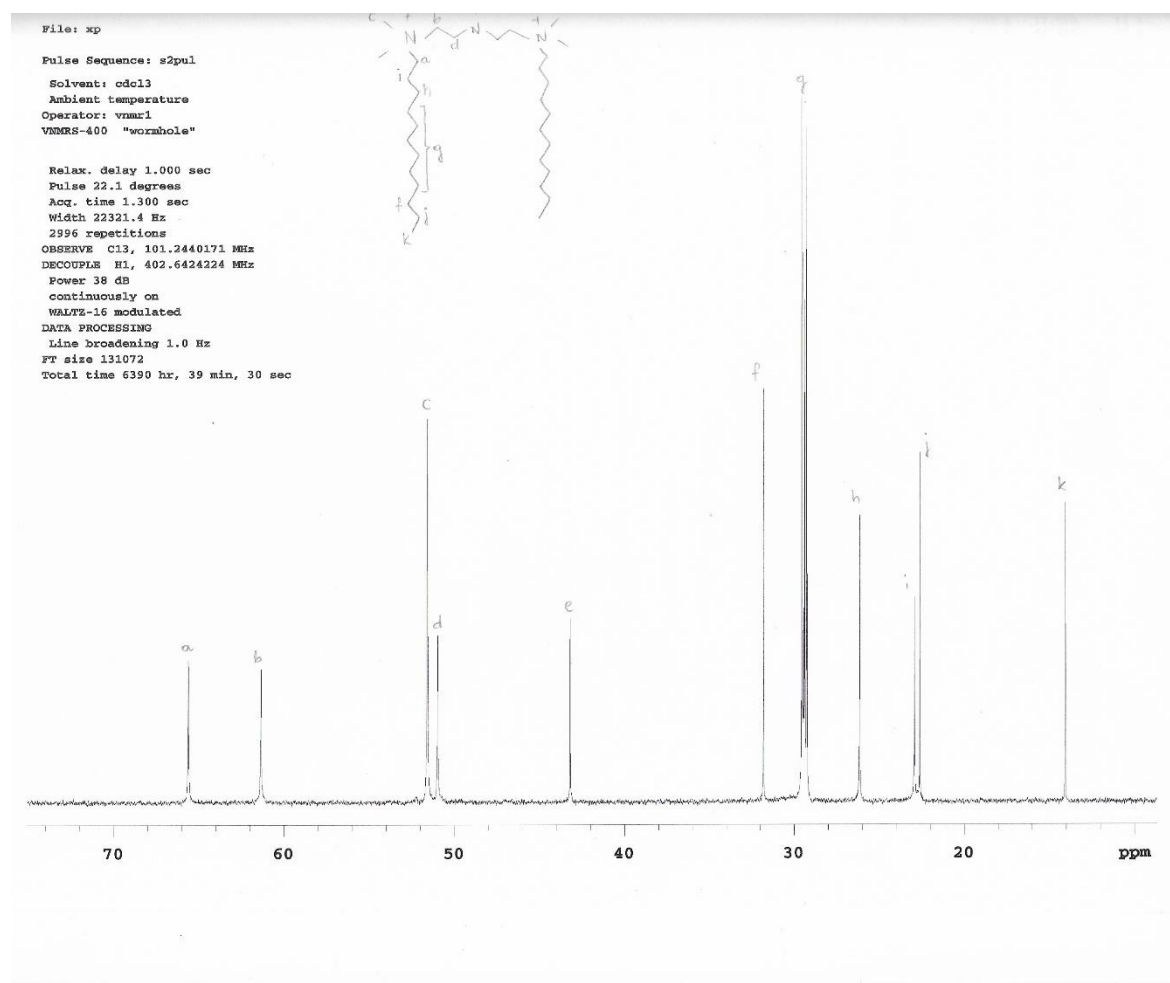

# Compound 9 <sup>1</sup>H NMR

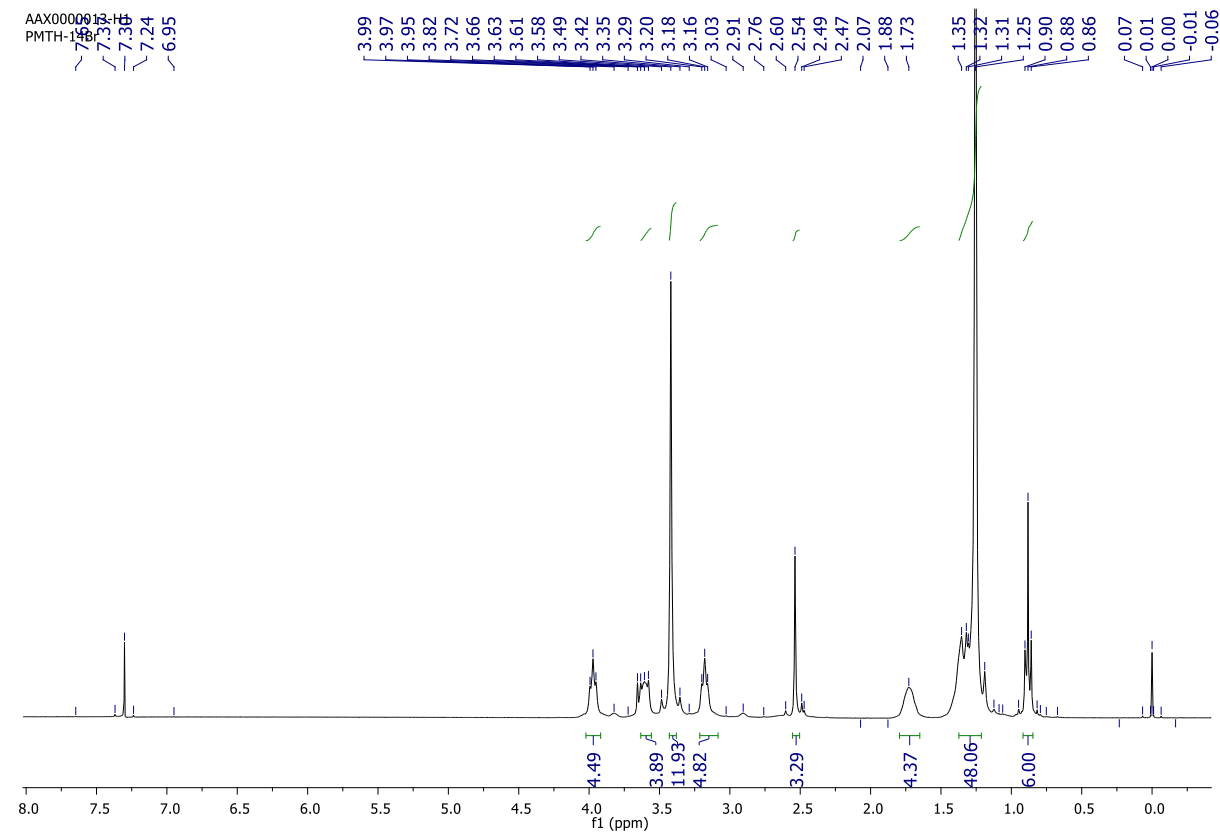



# Compound 9 <sup>13</sup>C NMR

AAX000013-C13  
PMTH-14Br

77.39  
77.17  
76.97  
76.54

65.35  
61.54  
61.13

51.15  
50.74  
48.29  
44.79  
43.05

31.79  
29.56  
29.53  
29.49  
29.39  
29.31  
29.23  
26.20  
22.83  
22.56

14.00

-0.14

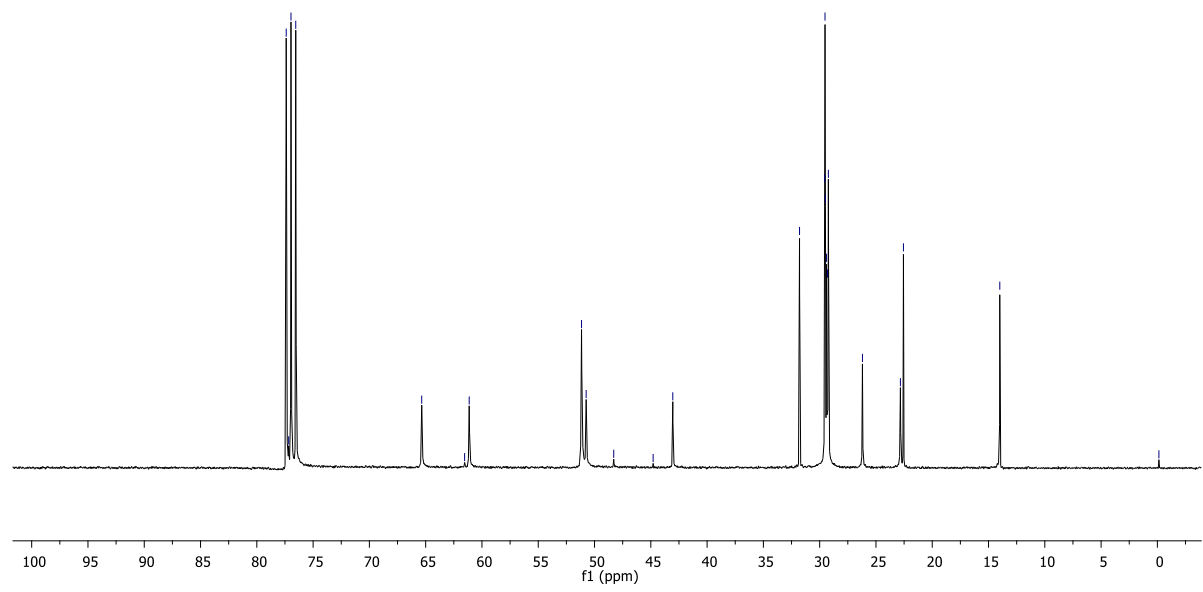

# Compound 10 <sup>1</sup>H NMR

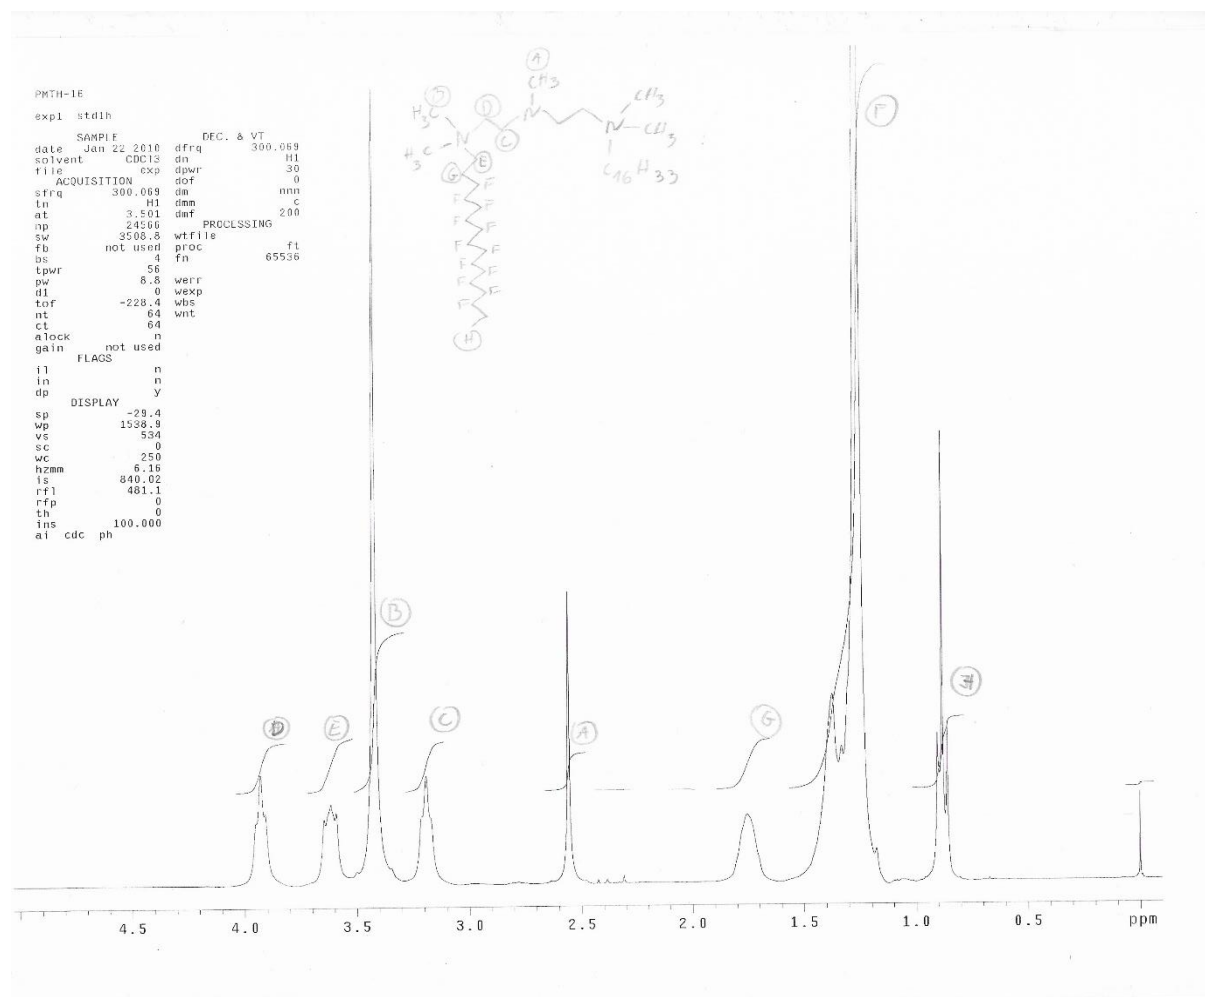

# Compound 10 <sup>13</sup>C NMR

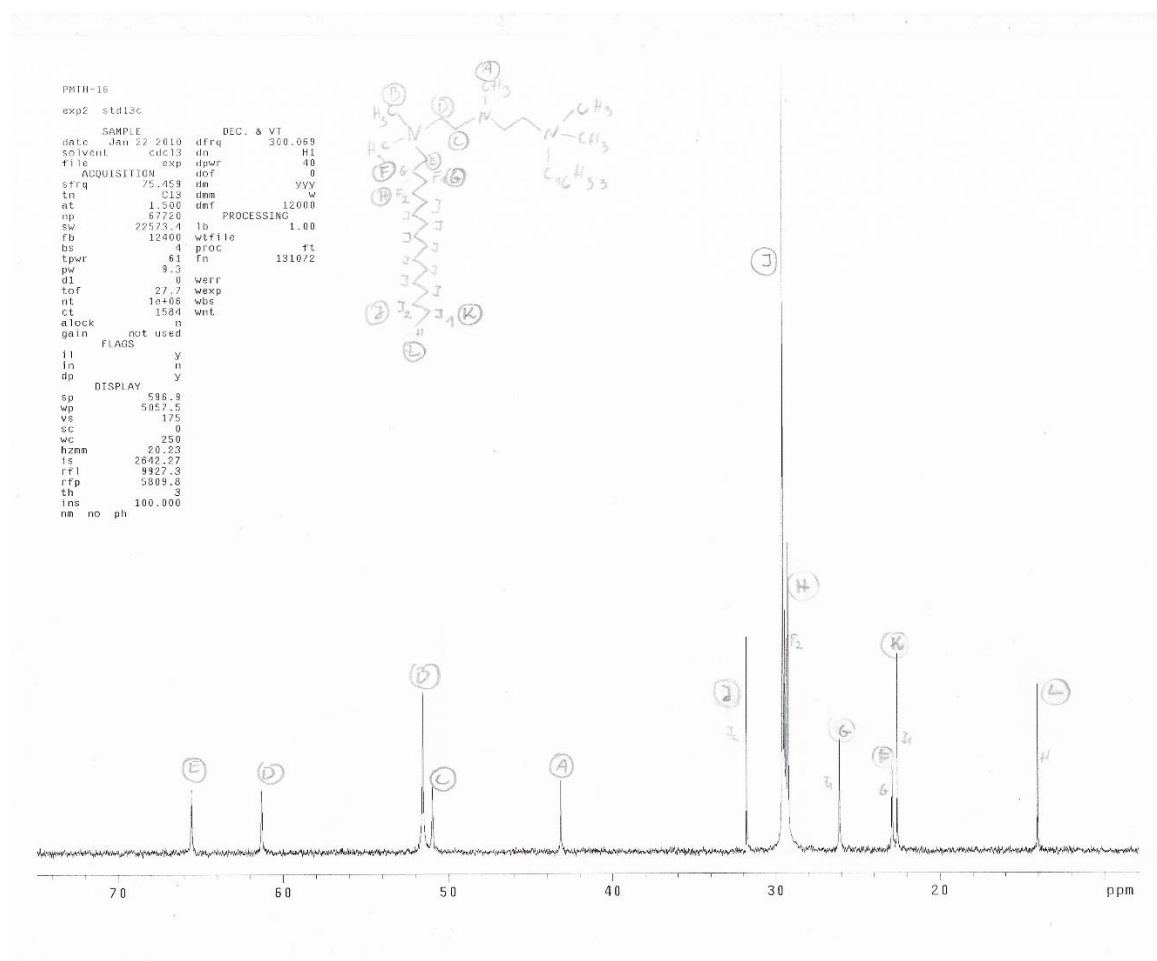

# Compound 11 <sup>1</sup>H NMR

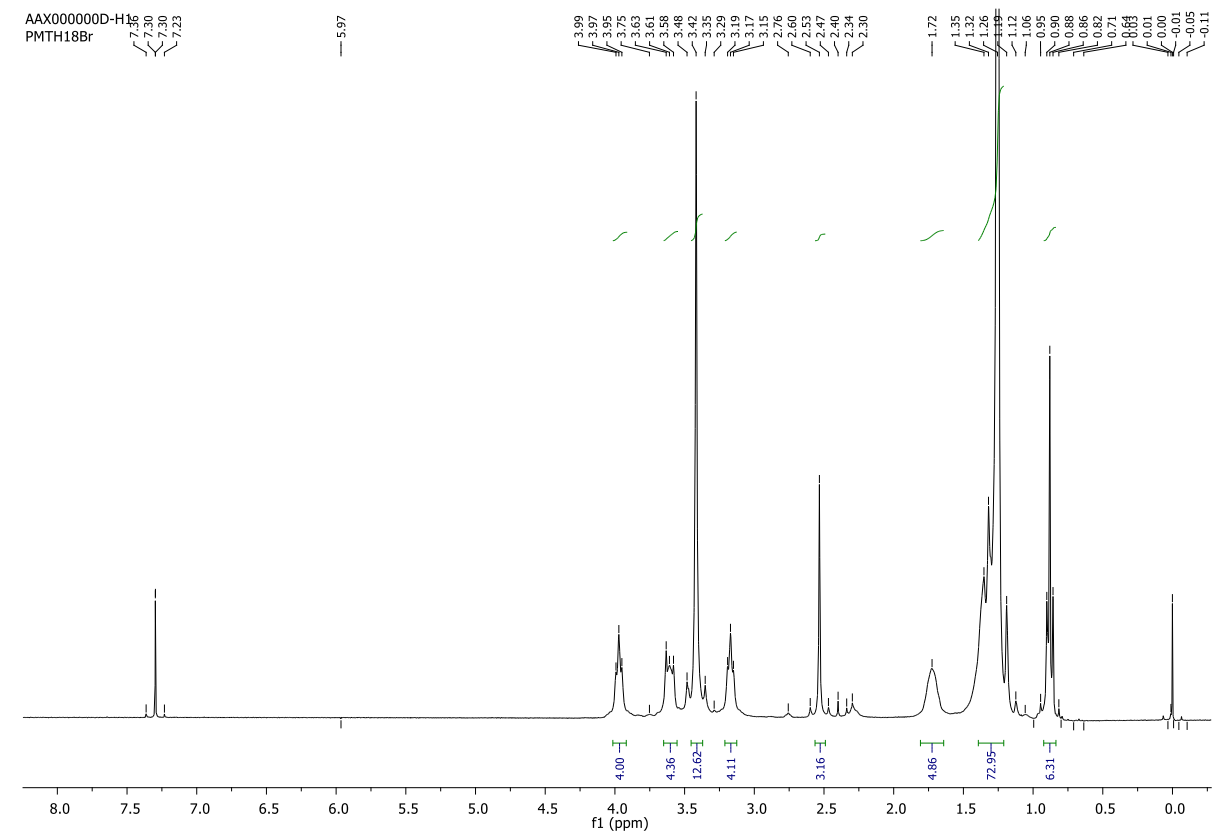

# Compound 11 <sup>13</sup>C NMR

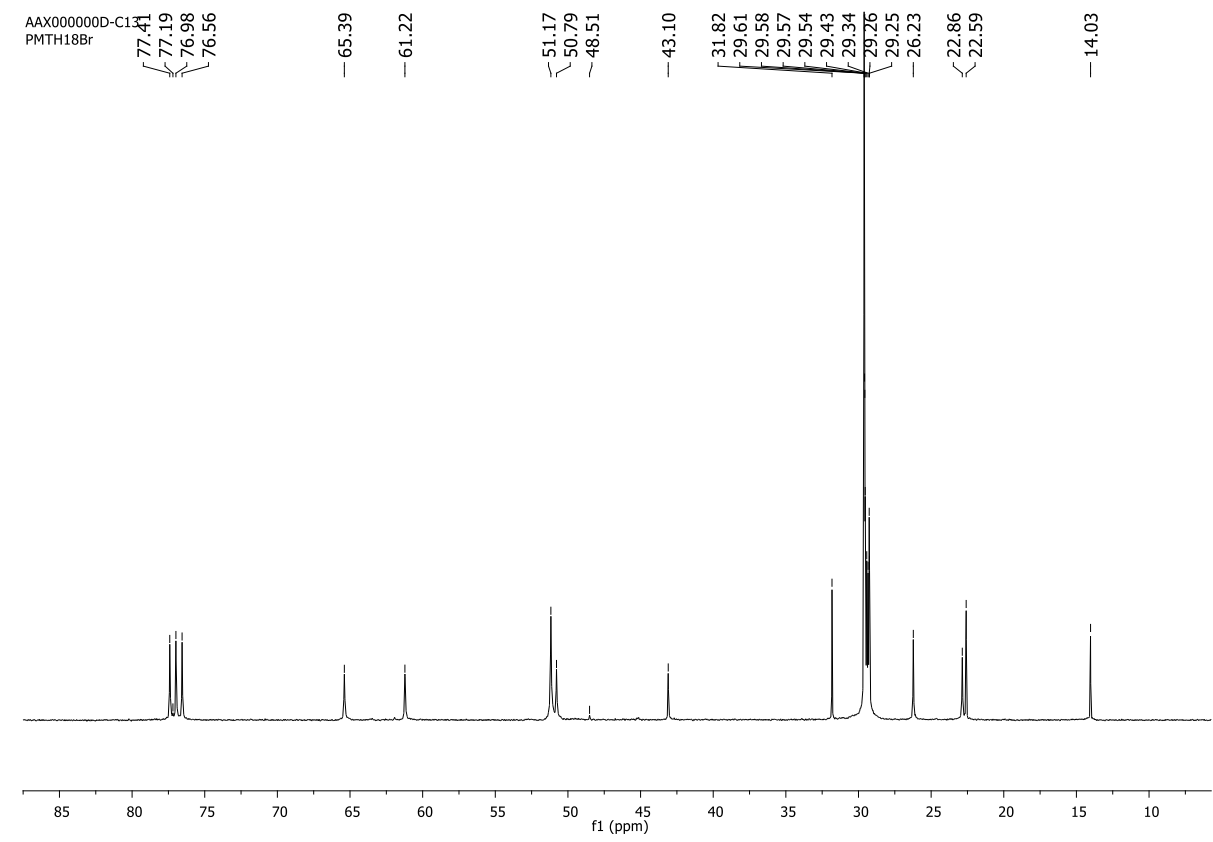

# Compound 12 <sup>1</sup>H NMR

TMW-18-8-18-Br *zohierine*

File: xp

Pulse Sequence: s2pul

Solvent: cdcl3

Ambient temperature

Operator: vmmx1

VNMR-400 "wormhole"

Relax. delay 0.500 sec

Pulse 45.0 degrees

Acq. time 3.500 sec

Width 6068.0 Hz

64 repetitions

OBSERVE H1, 402.6403949 MHz

DATA PROCESSING

Resol. enhancement -0.0 Hz

FT size 65536

Total time 4 min, 16 sec

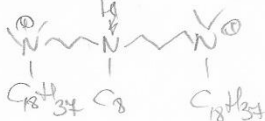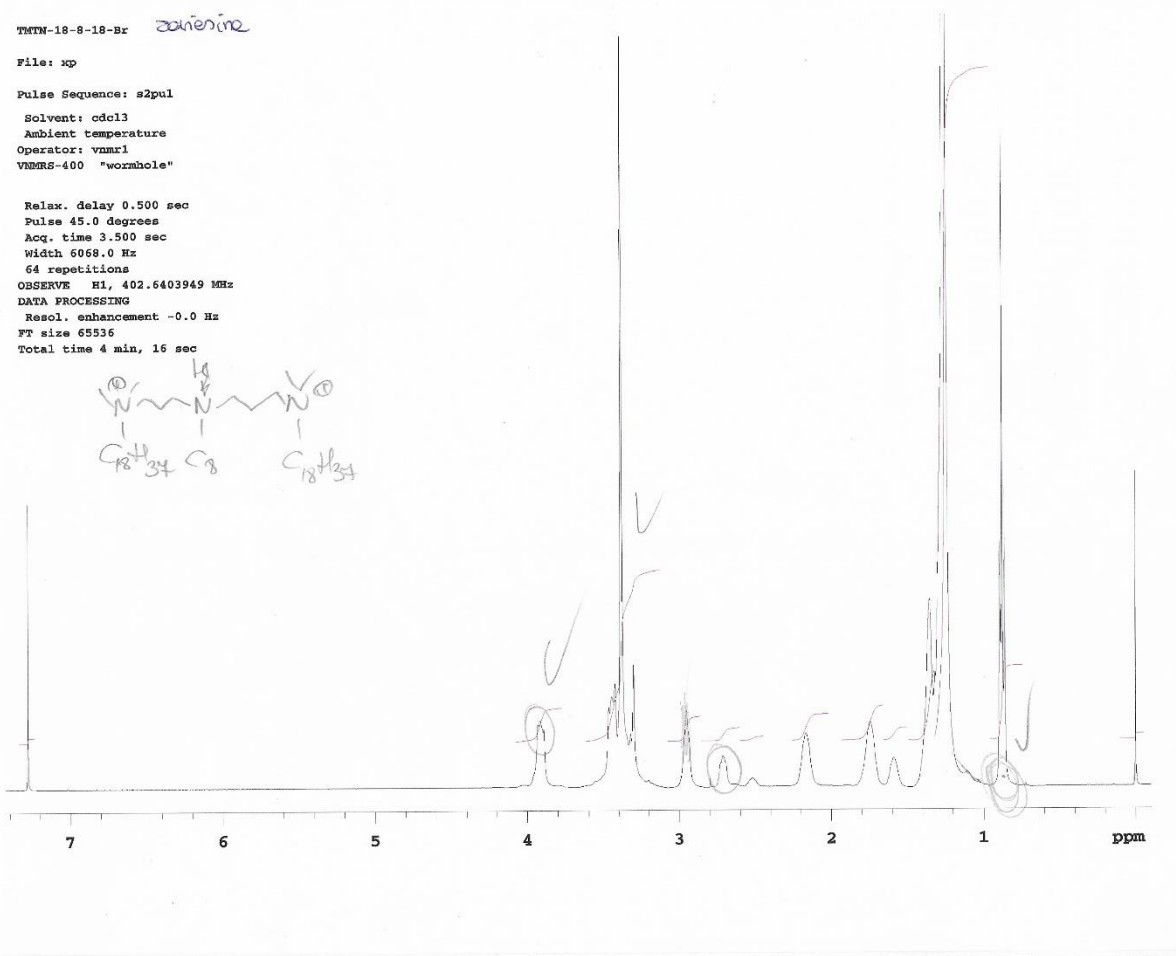

# Compound 12 <sup>13</sup>C NMR

TMN-18-8-18-Br *Zwiehne*

File: xp

Pulse Sequence: s2pul

Solvent: cdcl3  
Ambient temperature  
Operator: vnmr1  
VNMRS-400 "wormhole"

Relax. delay 1.000 sec  
Pulse 22.1 degrees  
Acq. time 1.300 sec  
Width 19531.2 Hz  
28020 repetitions  
OBSERVE C13, 101.2440144 MHz  
DECOUPLE H1, 402.6424224 MHz  
Power 38 dB  
continuously on  
WALTZ-16 modulated  
DATA PROCESSING  
Line broadening 1.0 Hz  
FT size 131072  
Total time 639 hr, 3 min, 38 sec

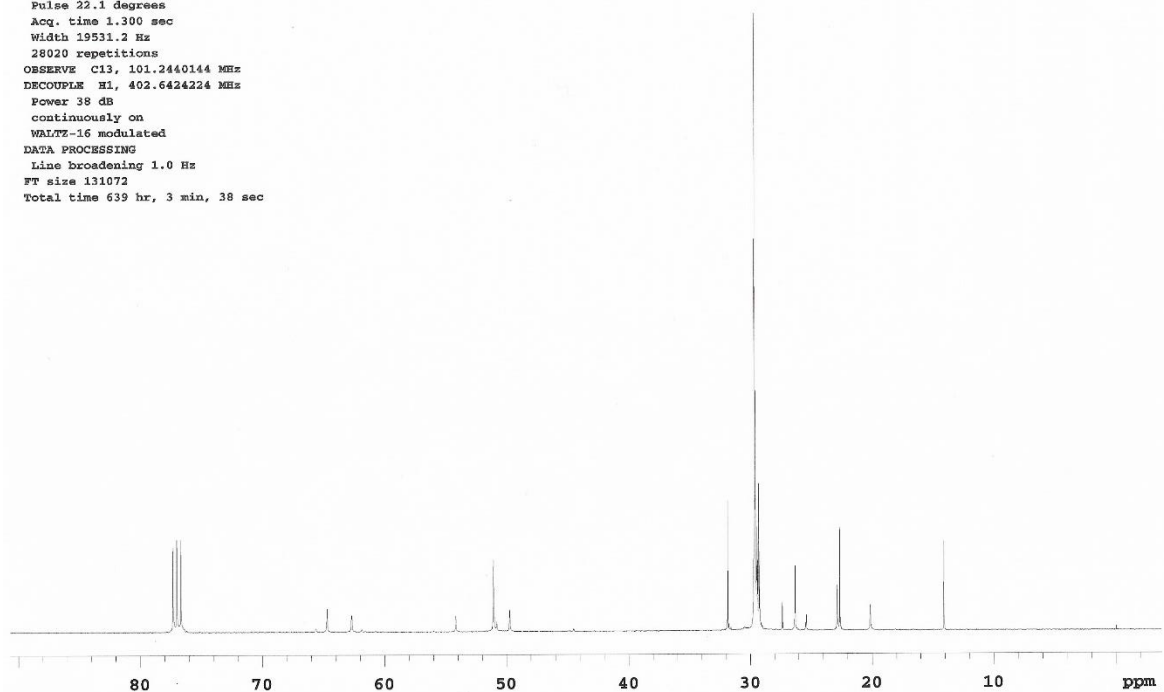

# Compound 13 <sup>1</sup>H NMR

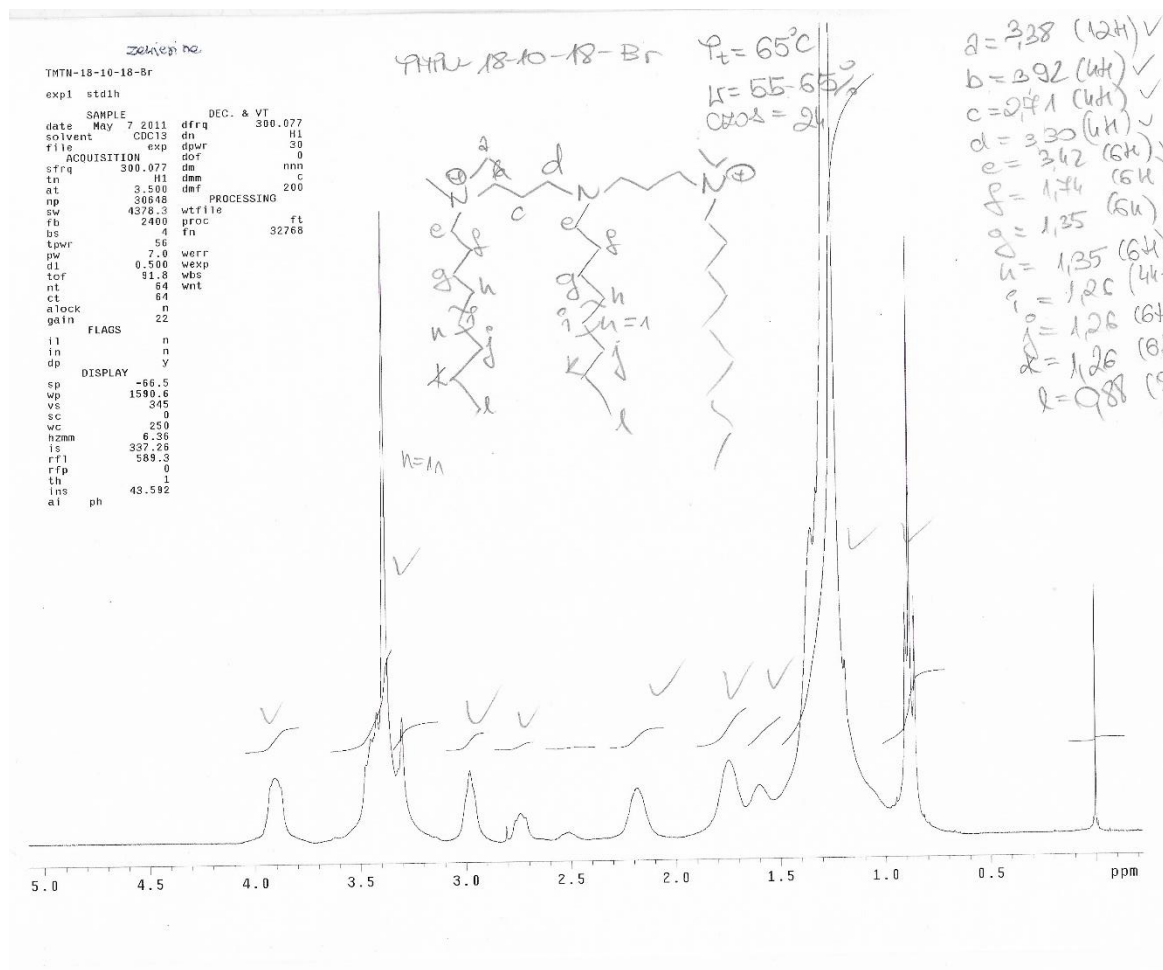



# Compound 13 <sup>13</sup>C NMR

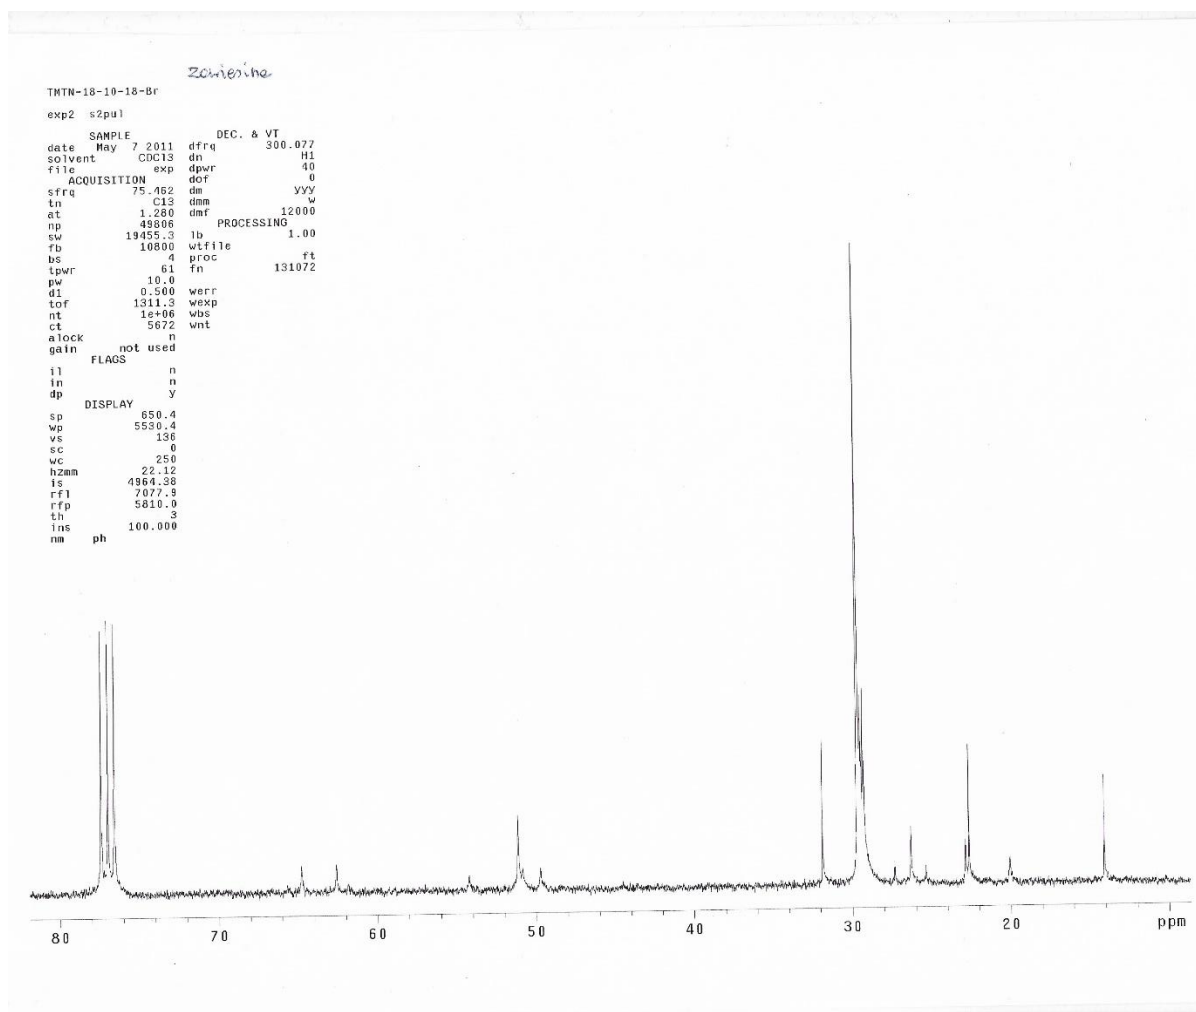

# Compound 14 <sup>1</sup>H NMR

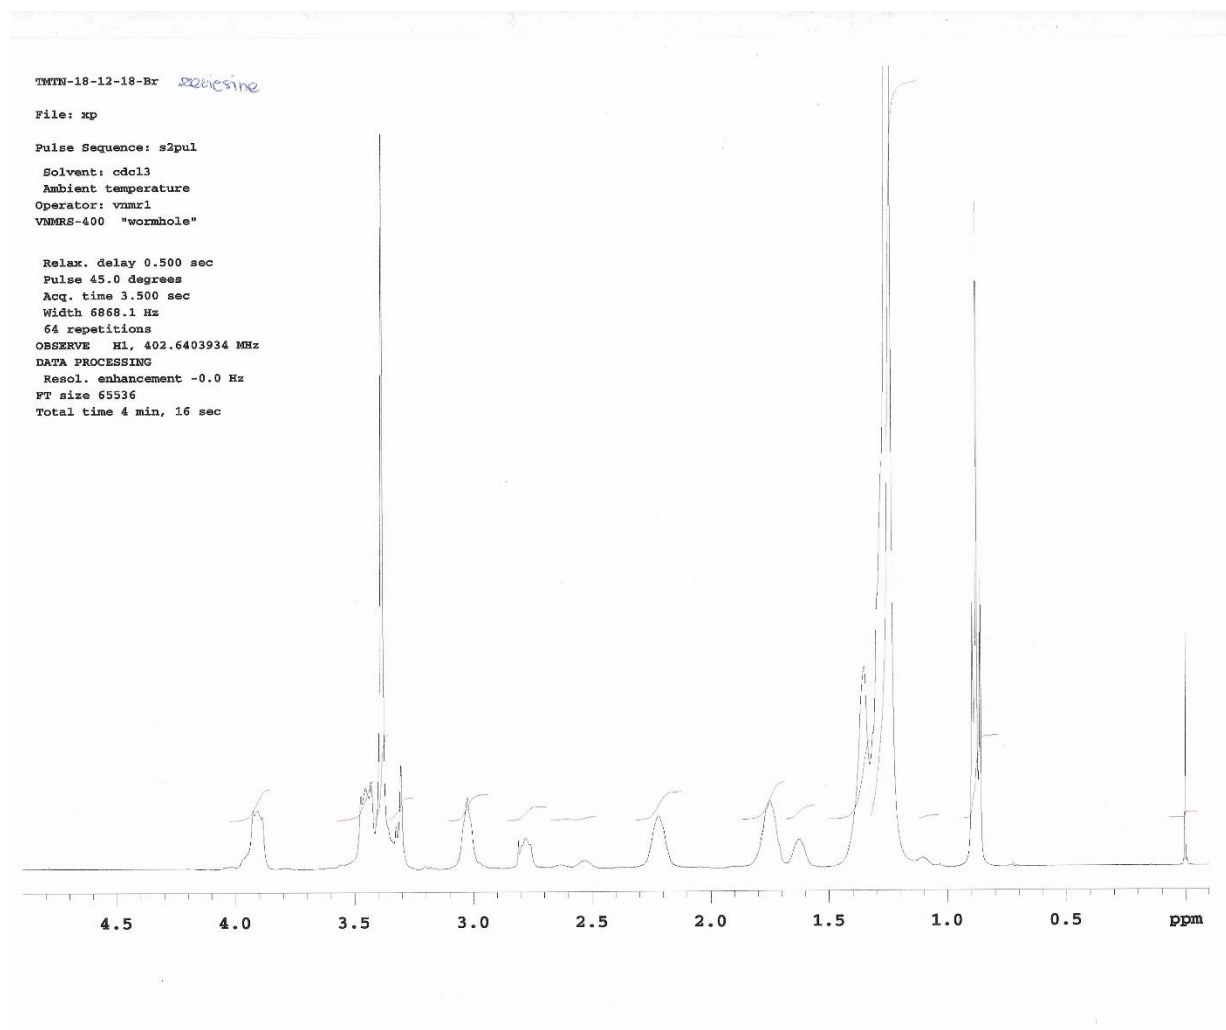

# Compound 14 <sup>13</sup>C NMR

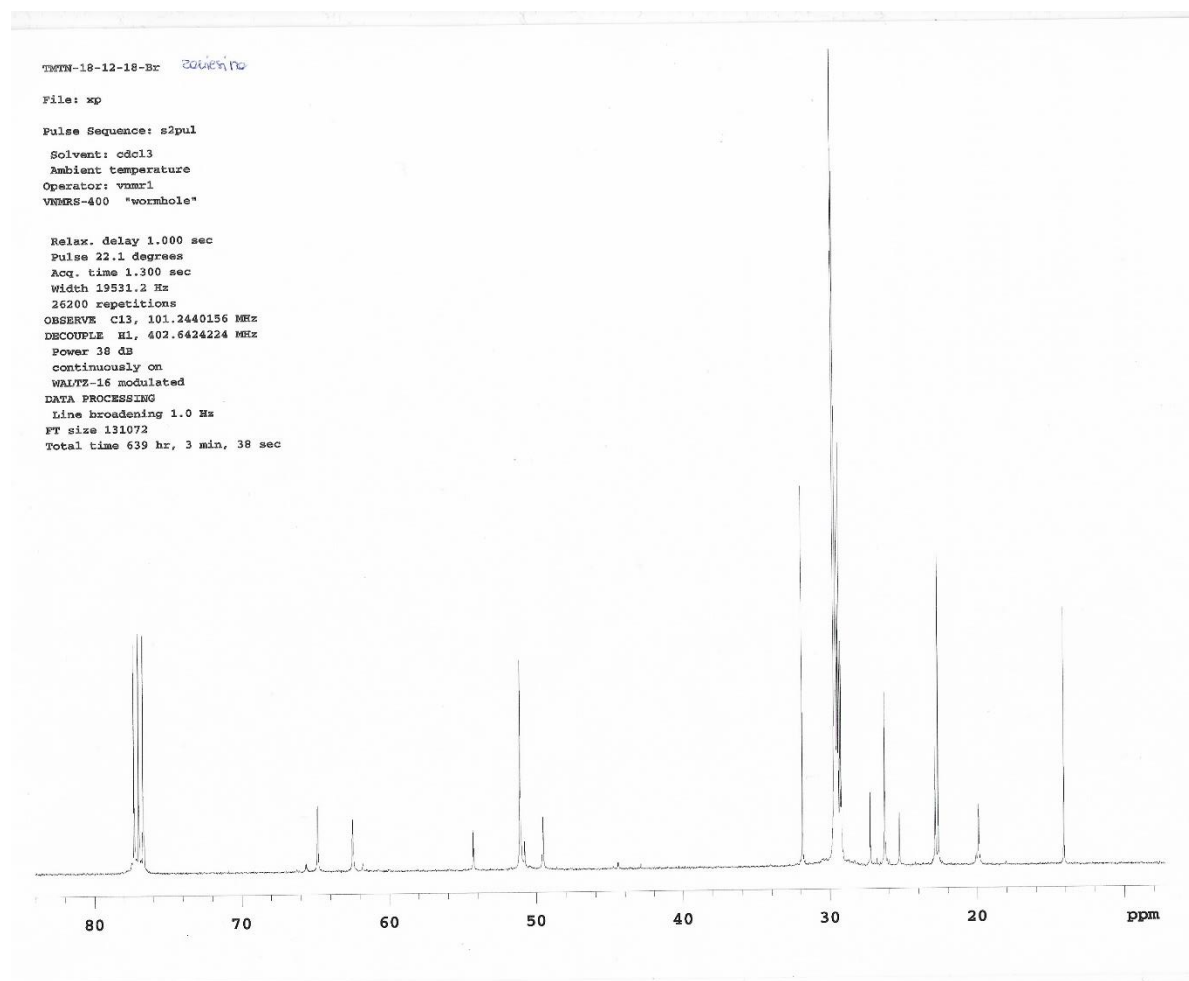

# Compound 15 <sup>1</sup>H NMR

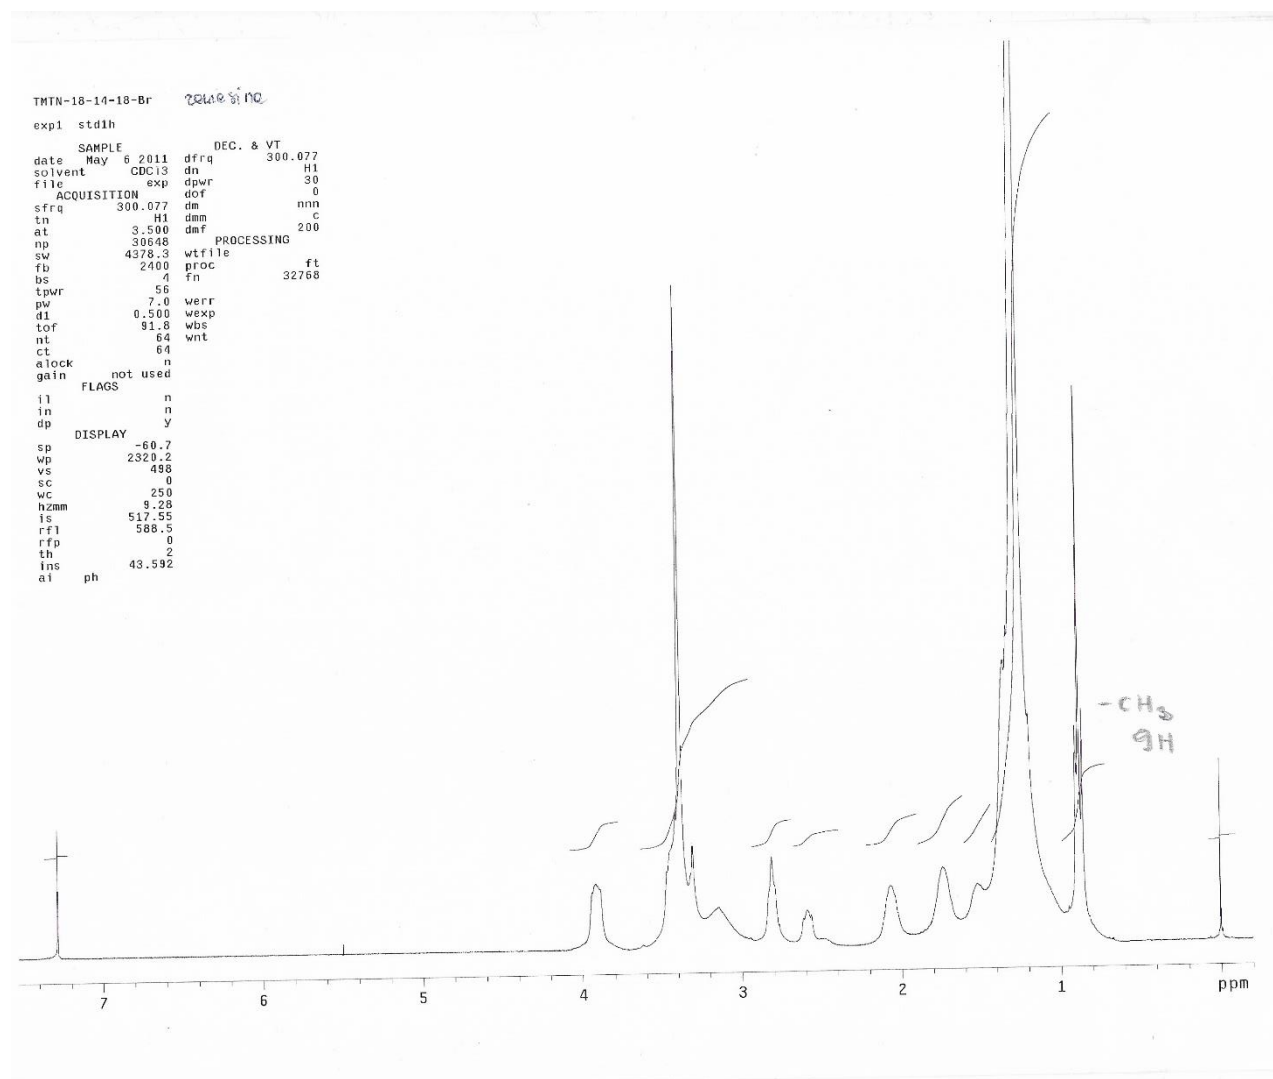

# Compound 15 <sup>13</sup>C NMR

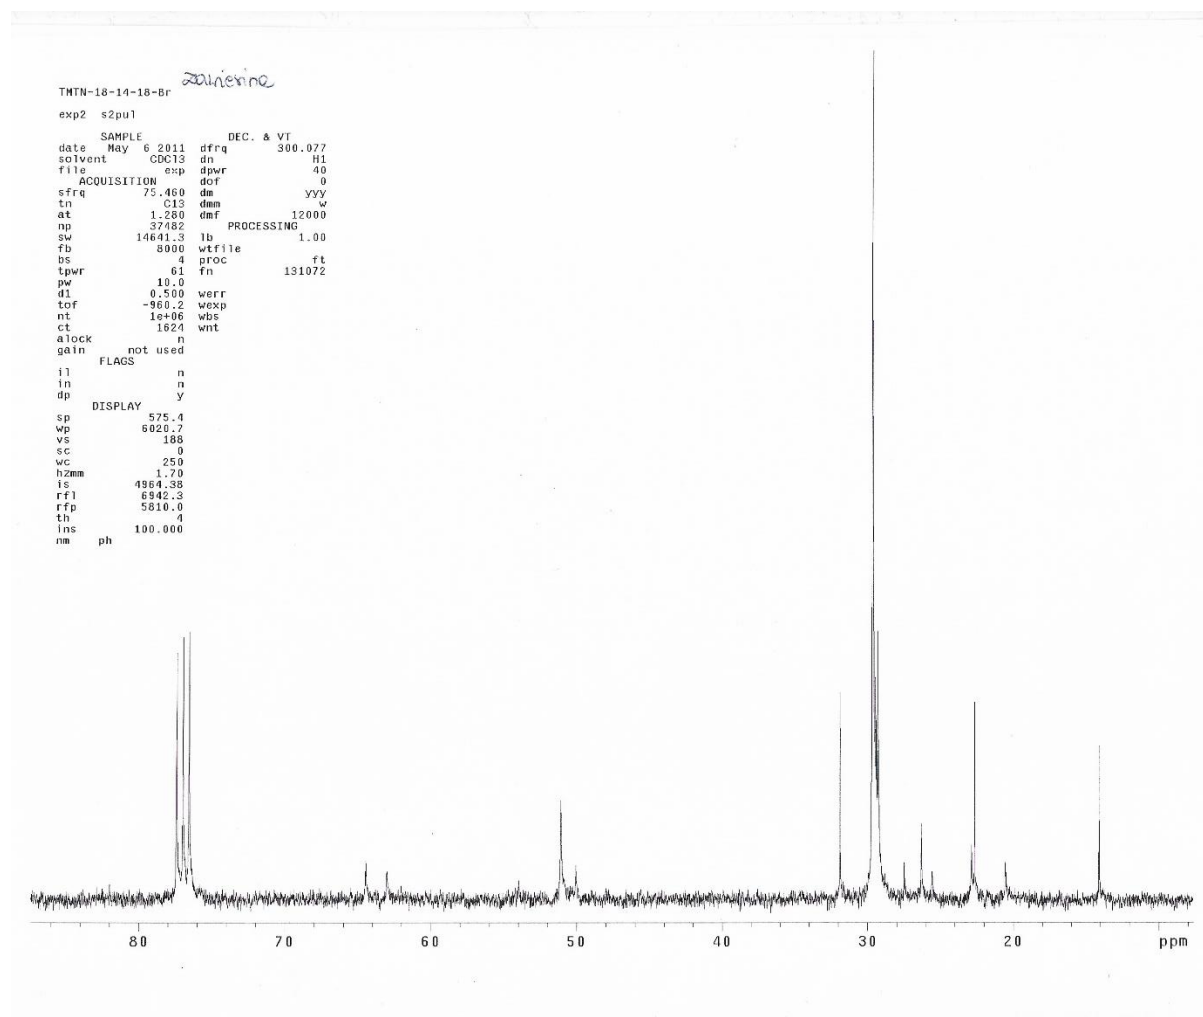

# Compound 16 <sup>1</sup>H NMR

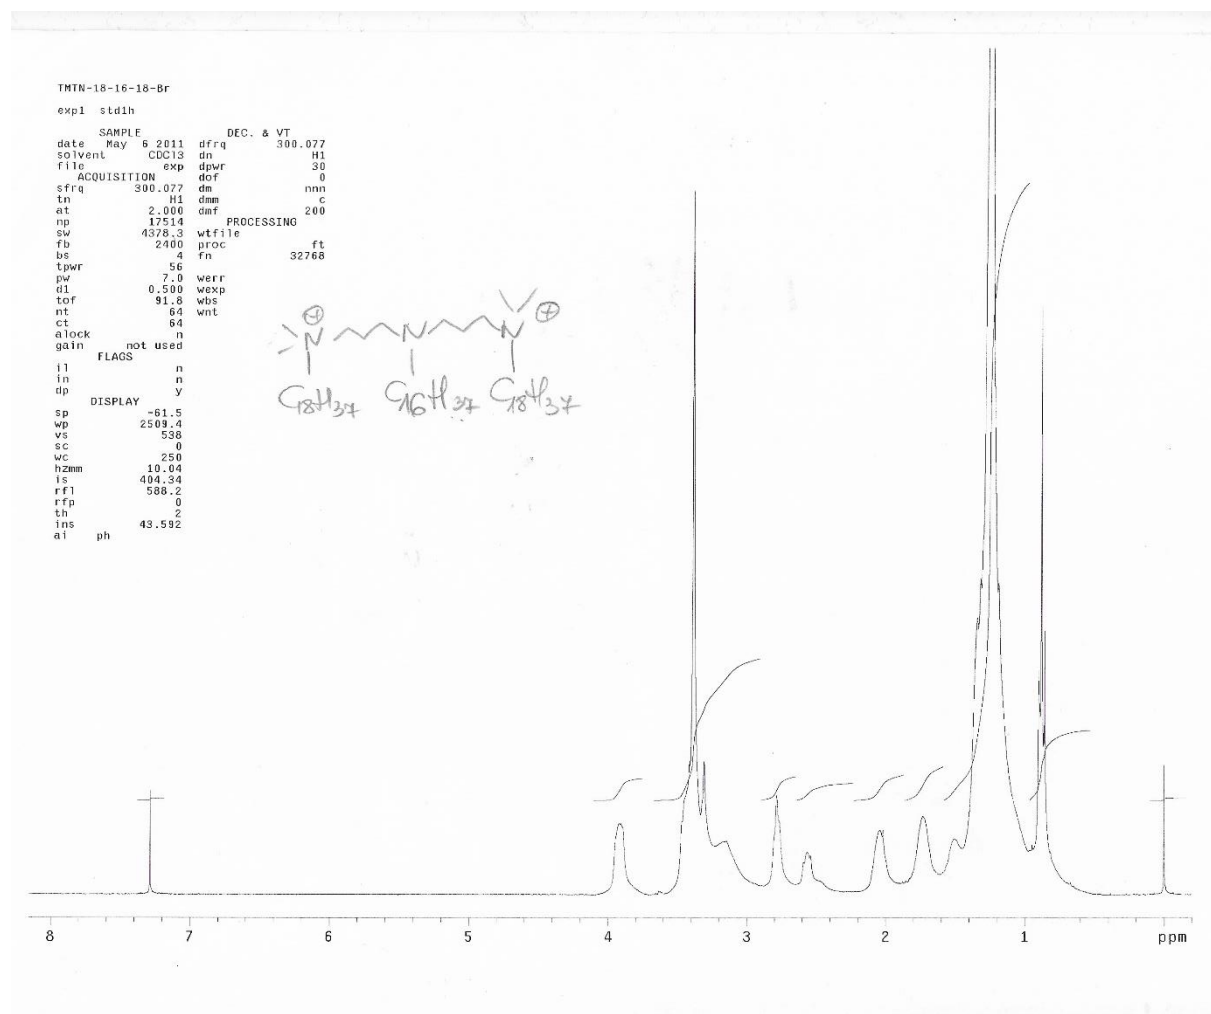

# Compound 16 <sup>13</sup>C NMR

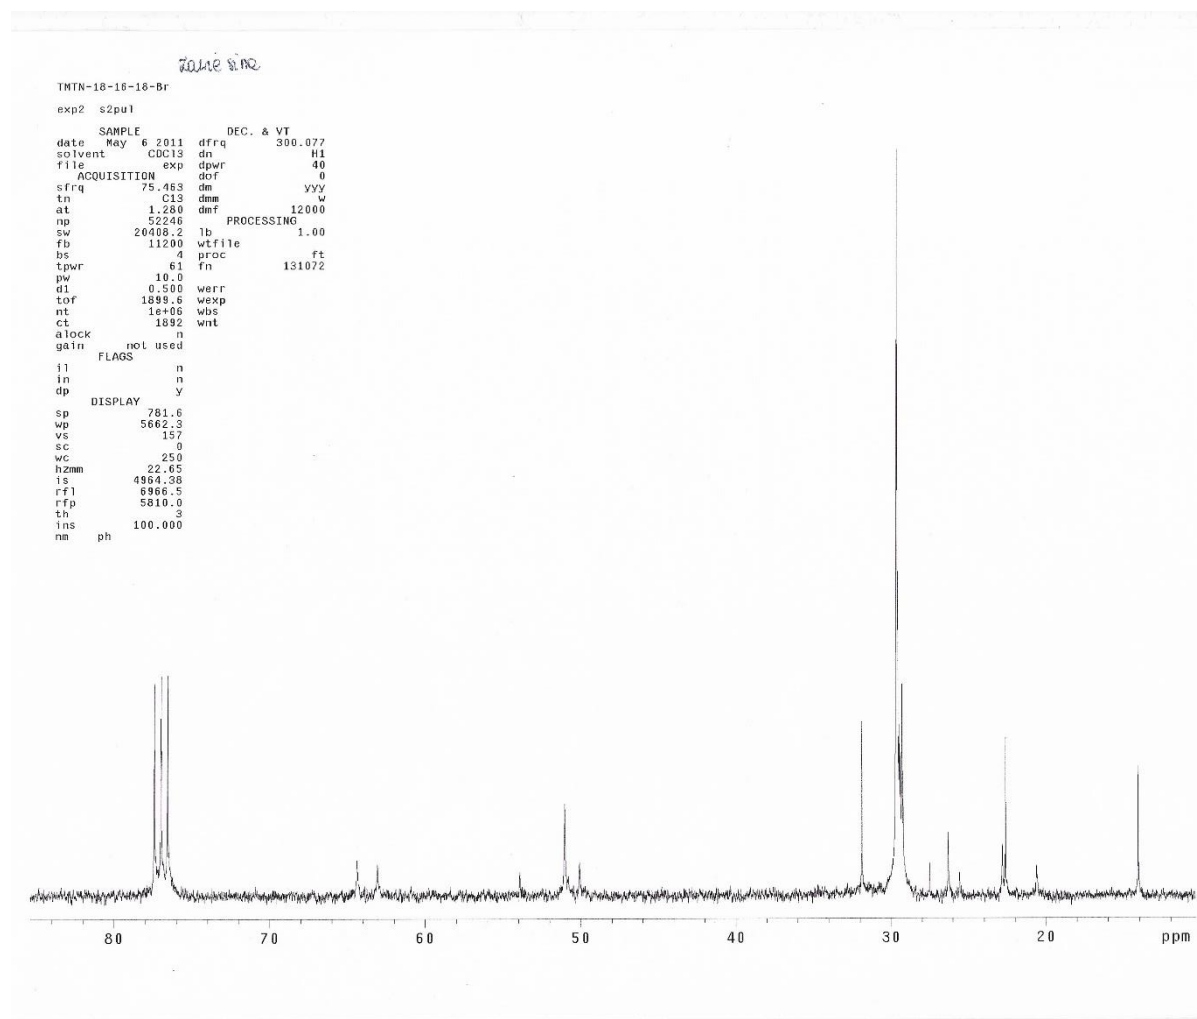

# Compound 17 <sup>1</sup>H NMR

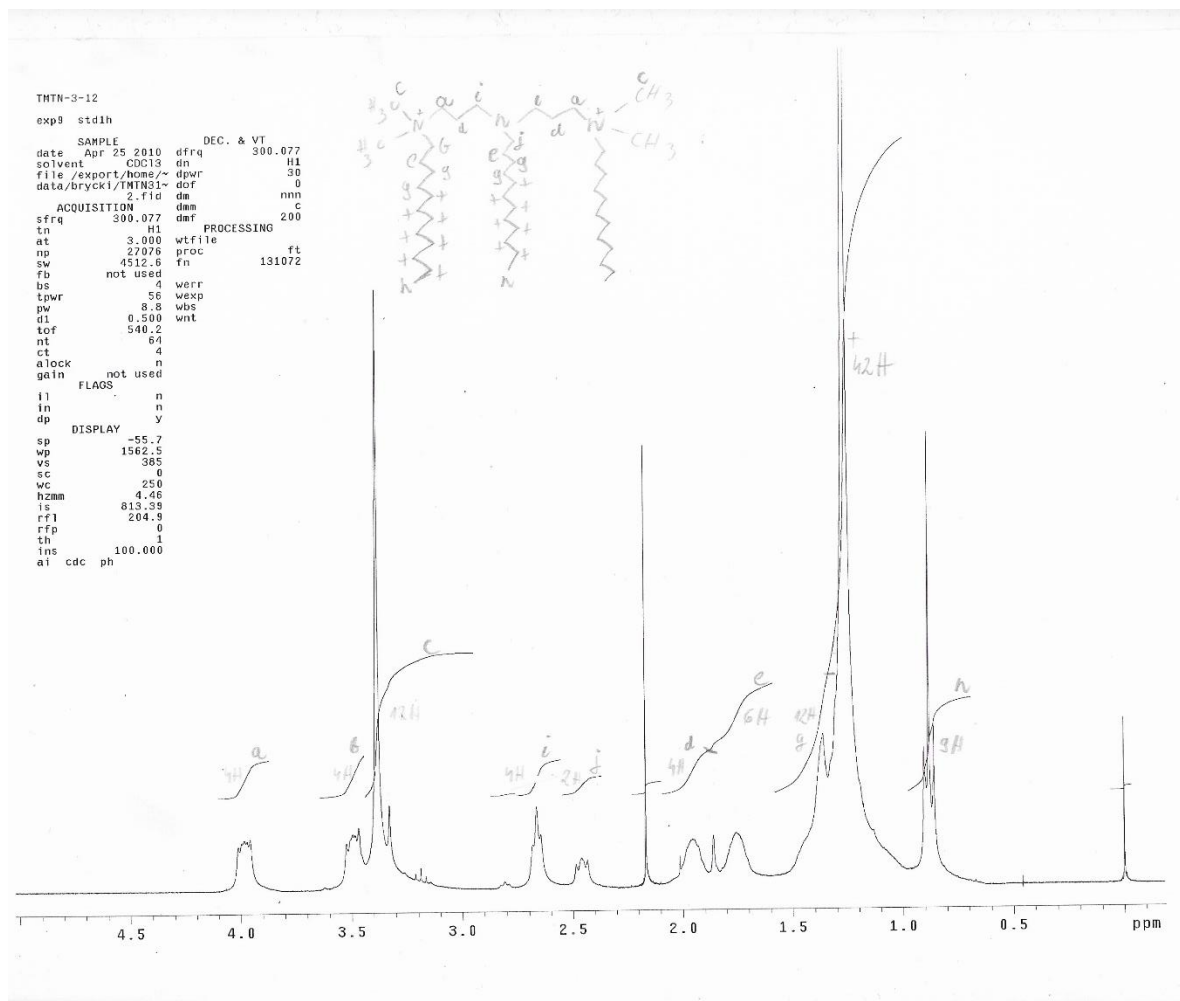



# Compound 17 <sup>13</sup>C NMR

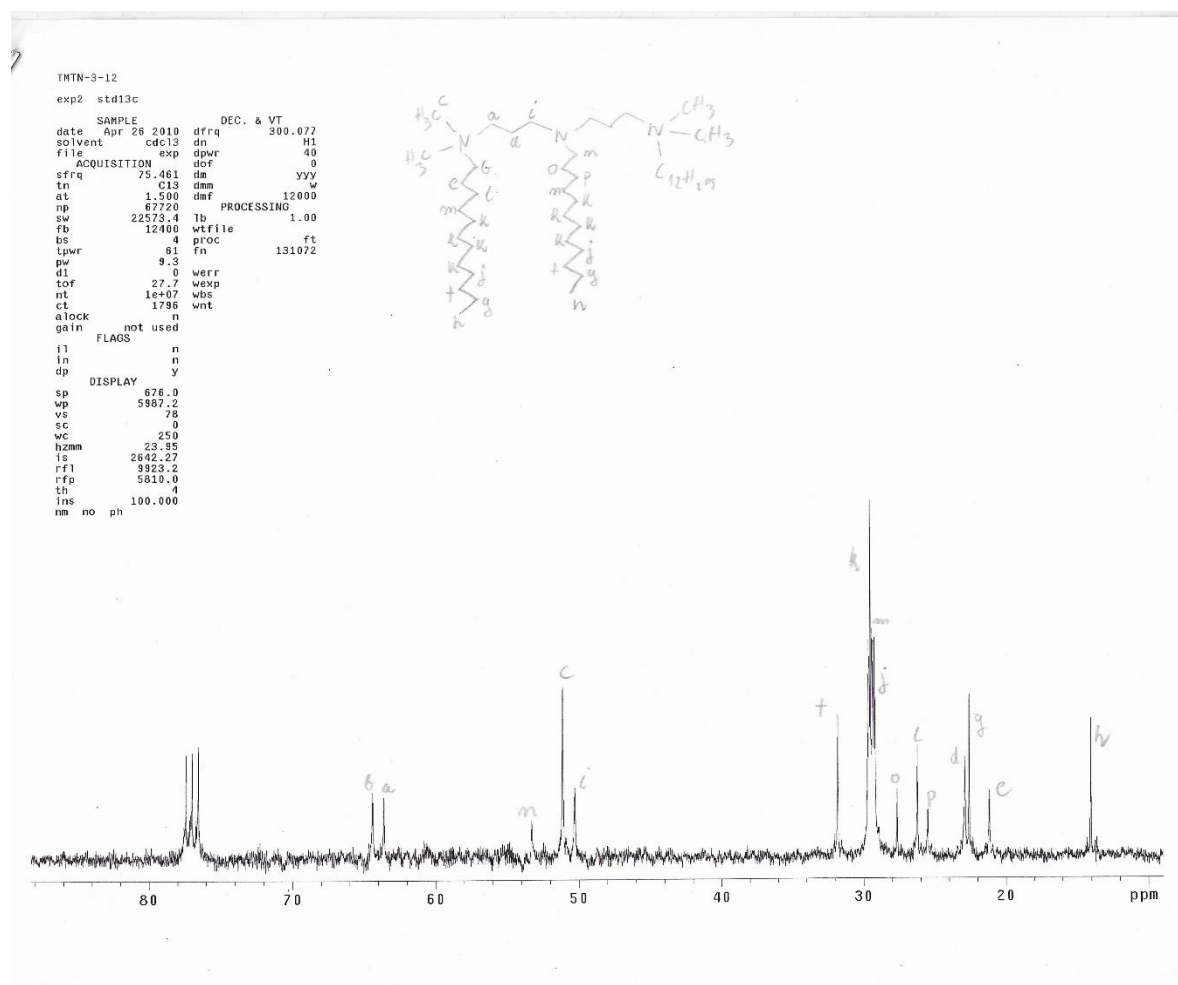

# Compound 18 <sup>1</sup>H NMR

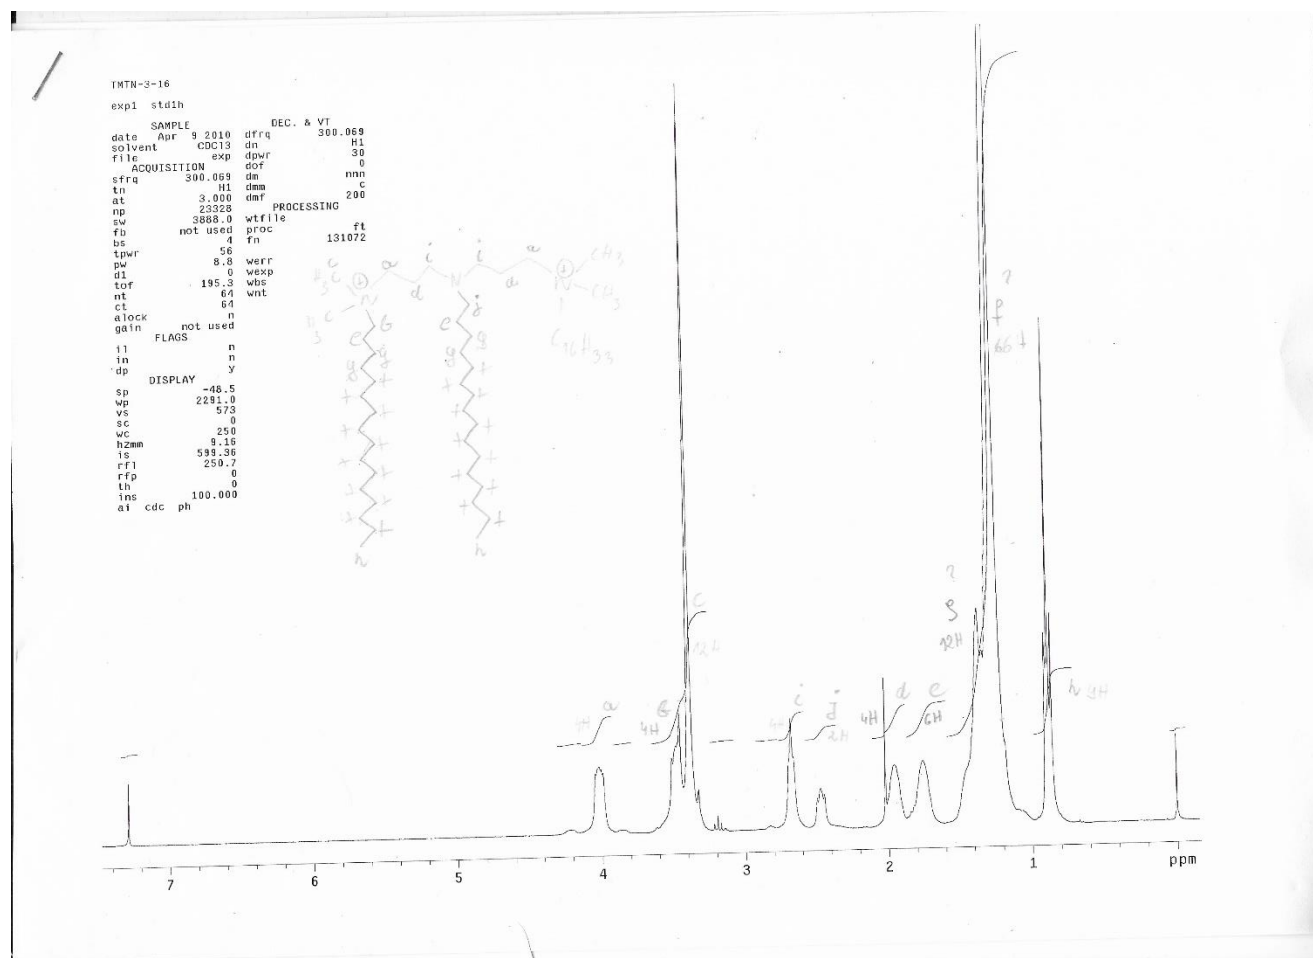

# Compound 18 <sup>13</sup>C NMR

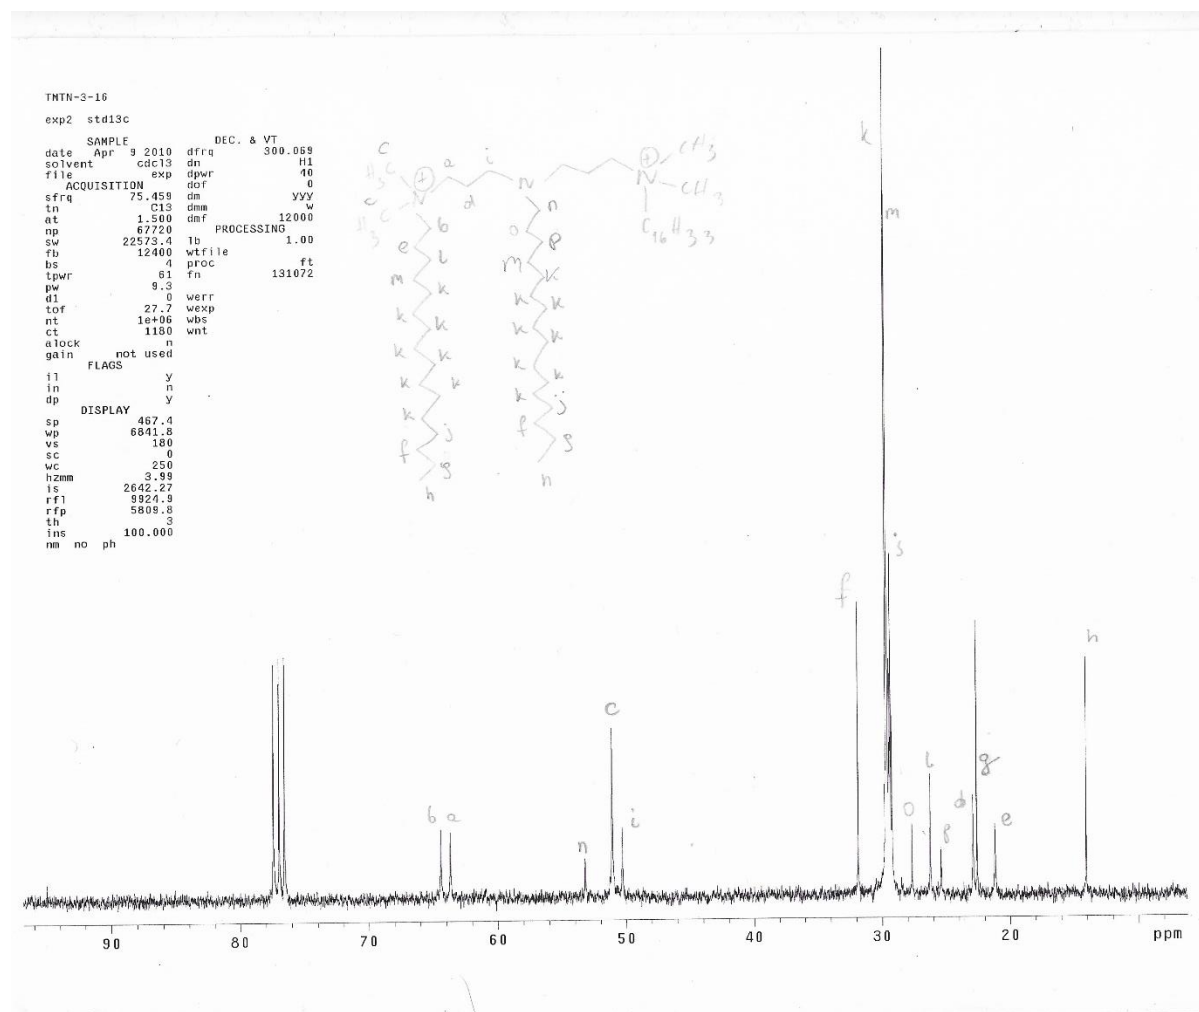

# Compound 19 <sup>1</sup>H NMR

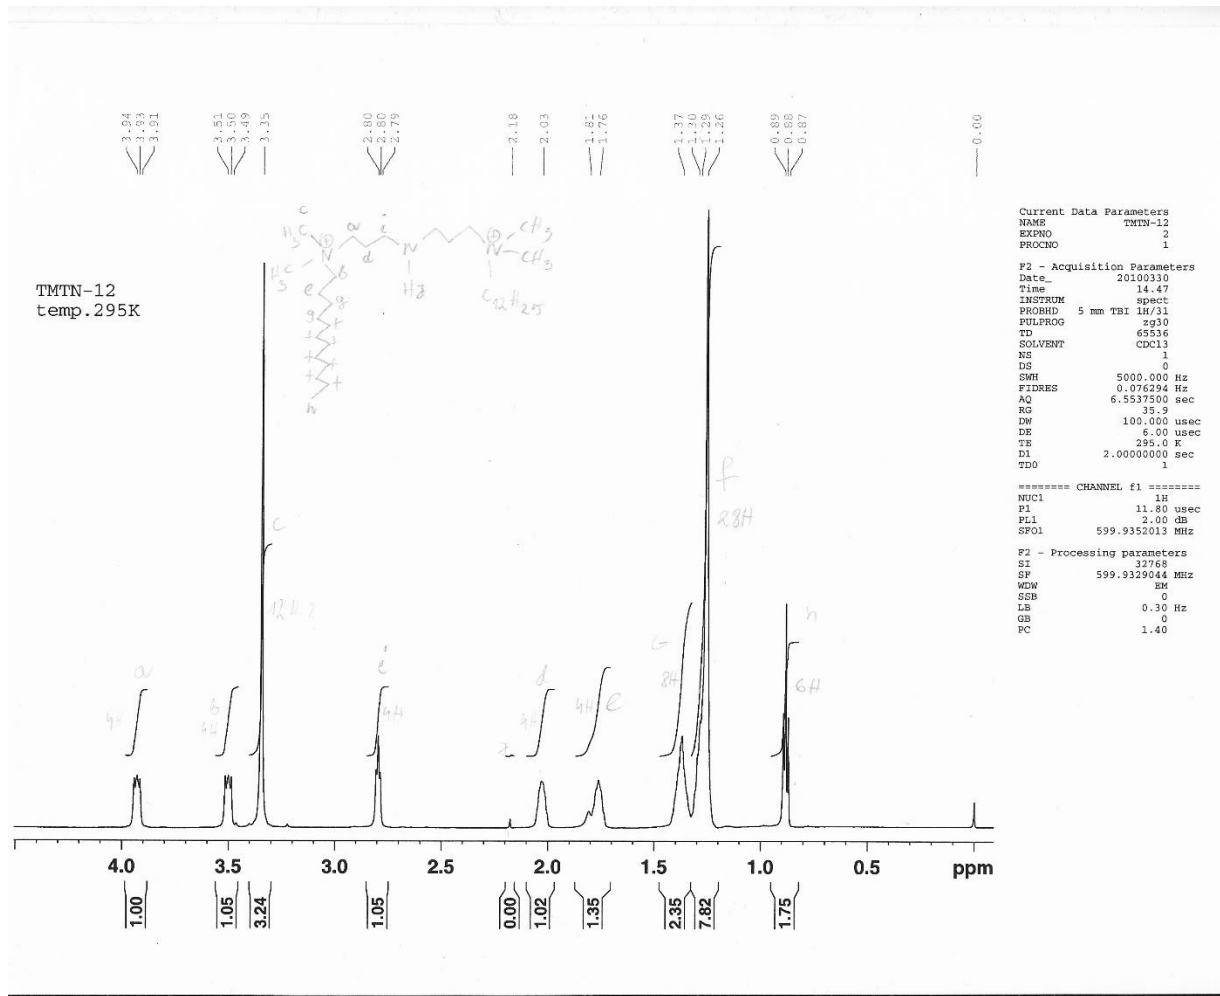

# Compound 19 <sup>13</sup>C NMR

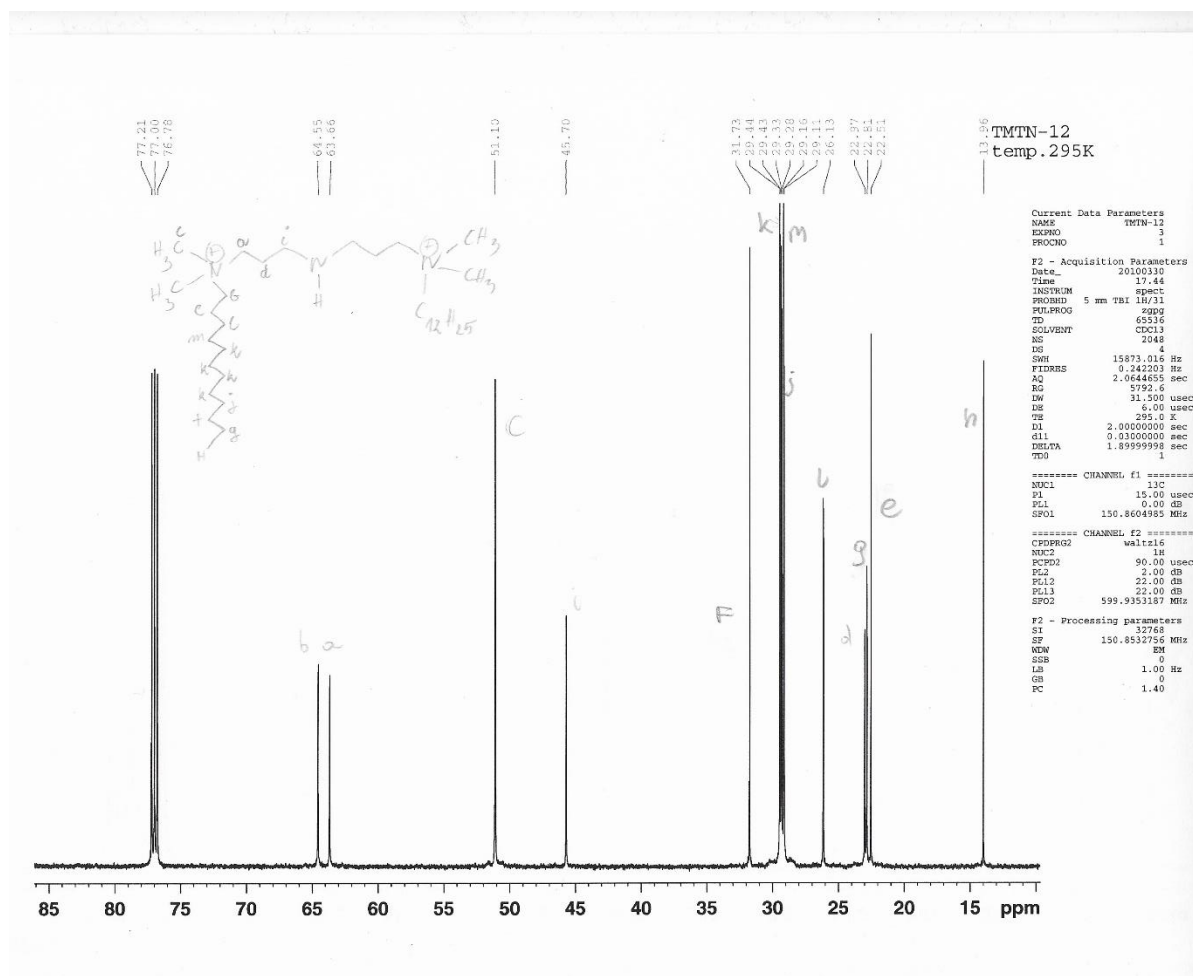

# Compound 20 <sup>1</sup>H NMR

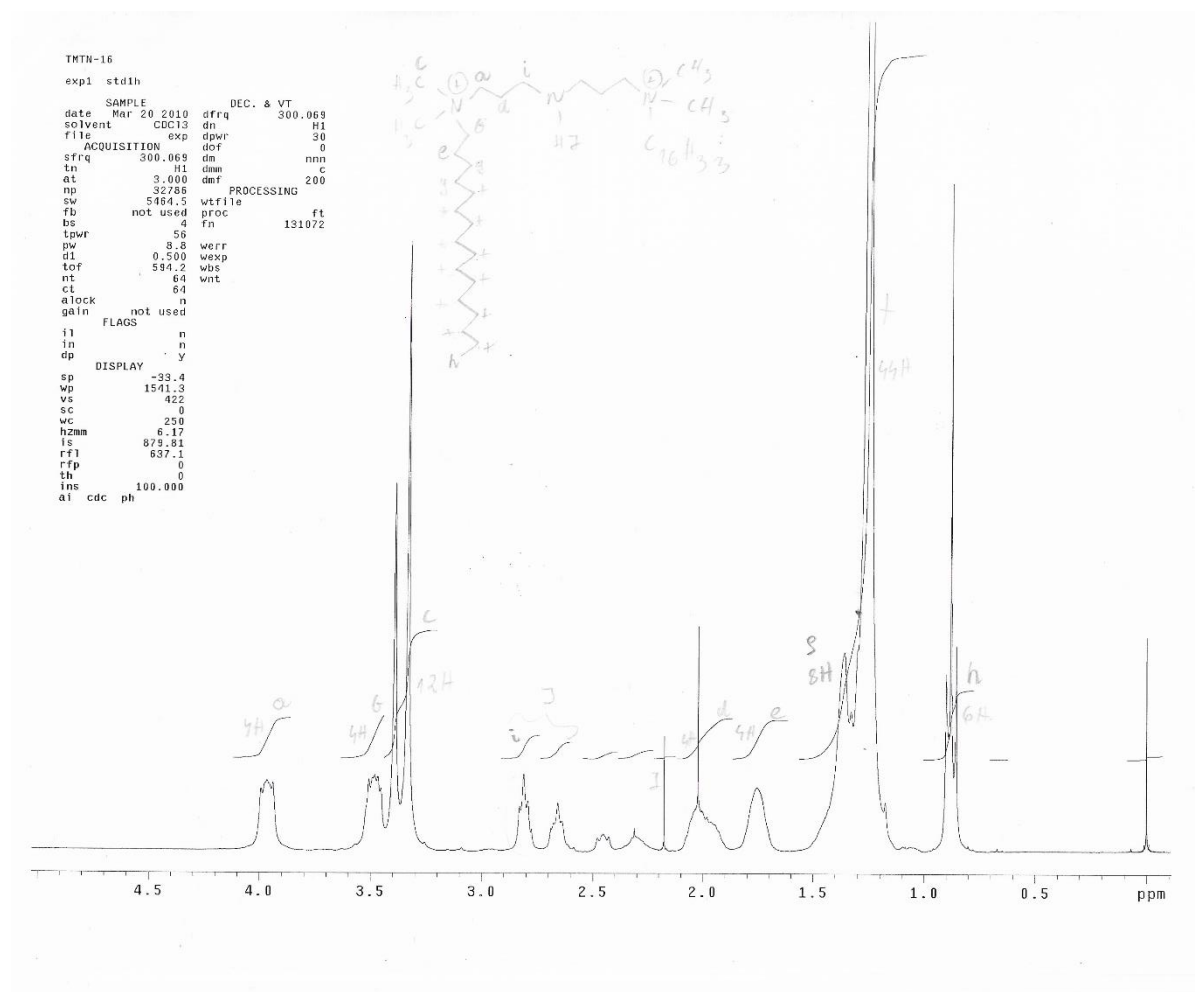

# Compound 20 <sup>13</sup>C NMR

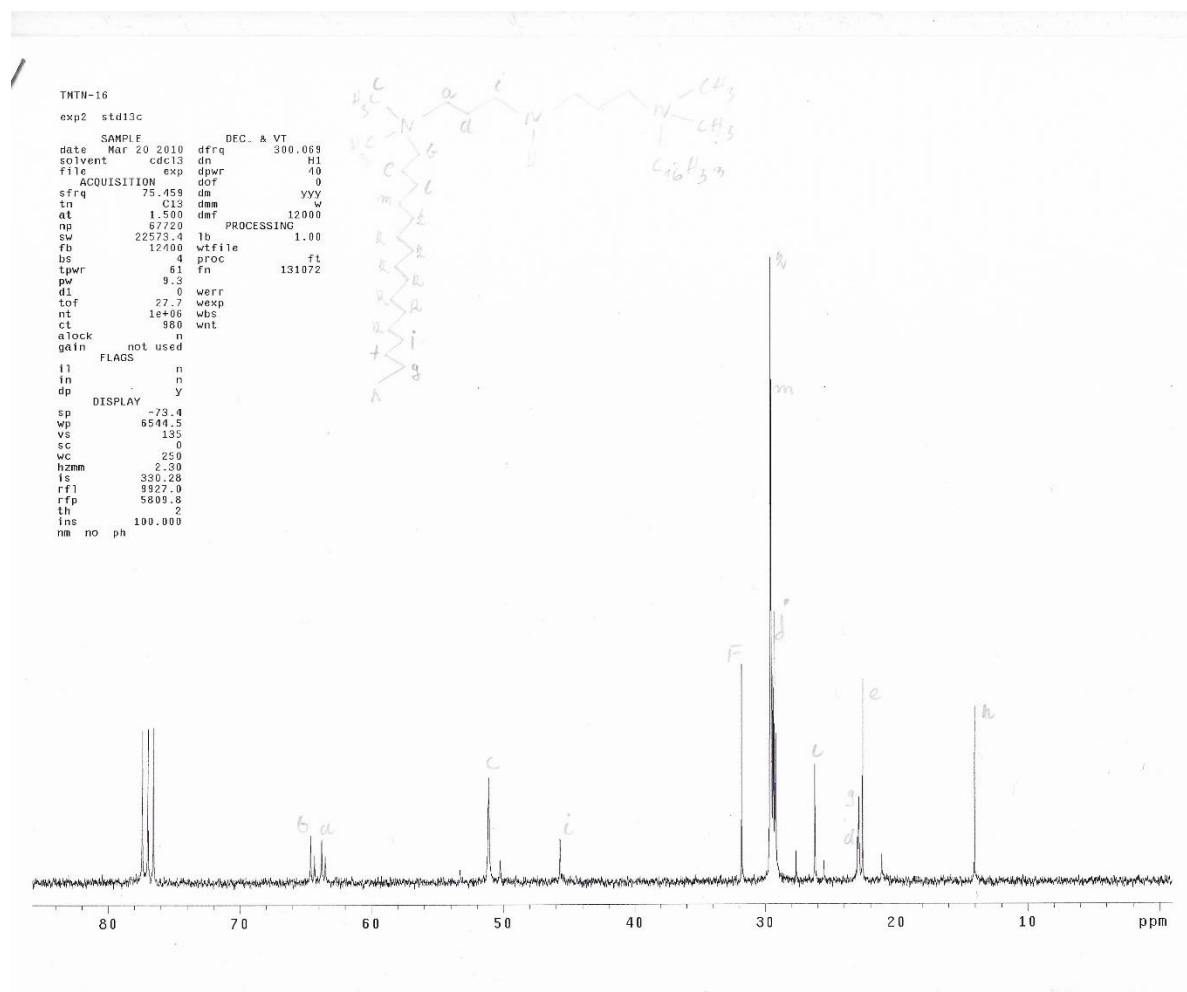

# Compound 21 <sup>1</sup>H NMR

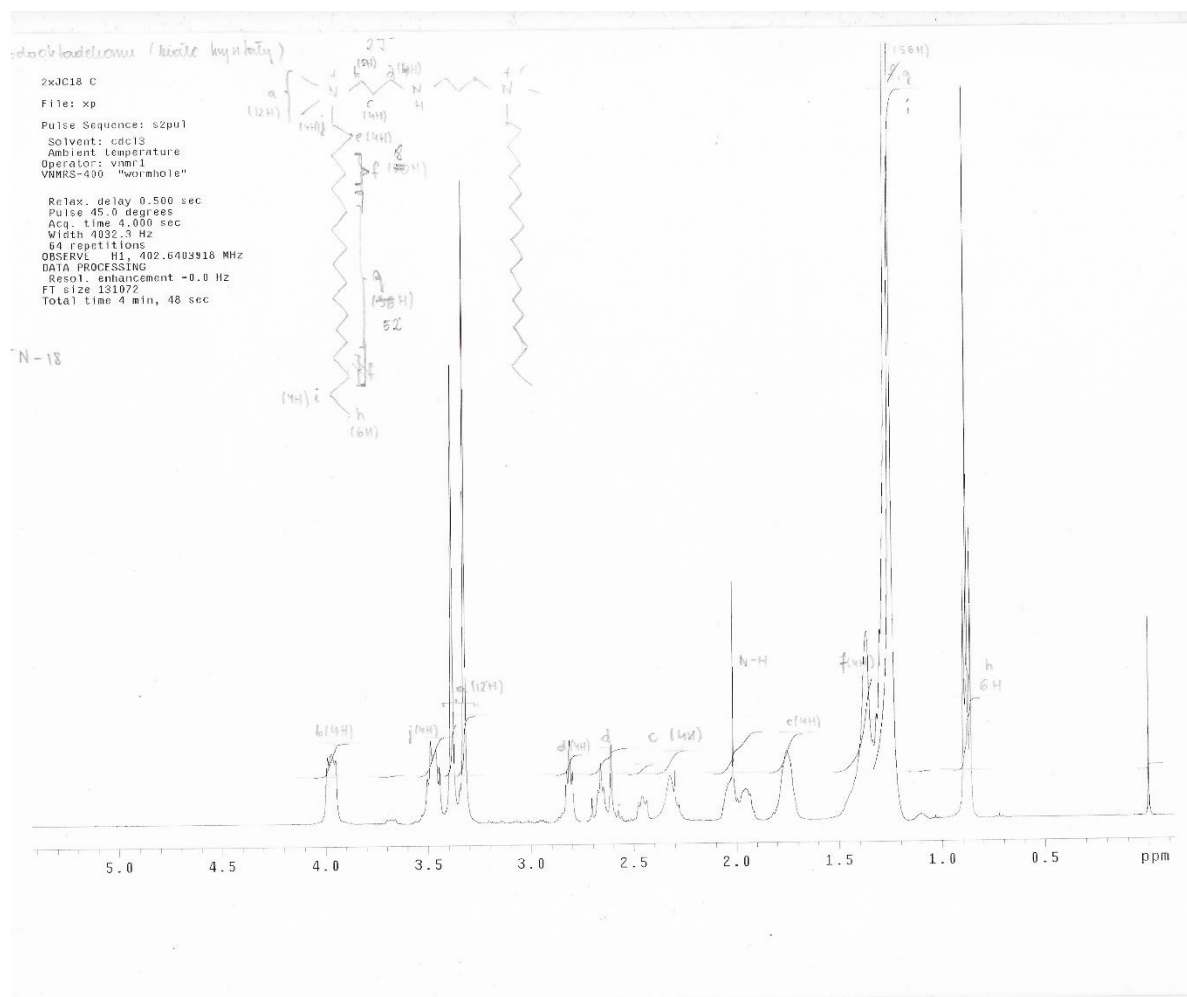



# Compound 21 <sup>13</sup>C NMR

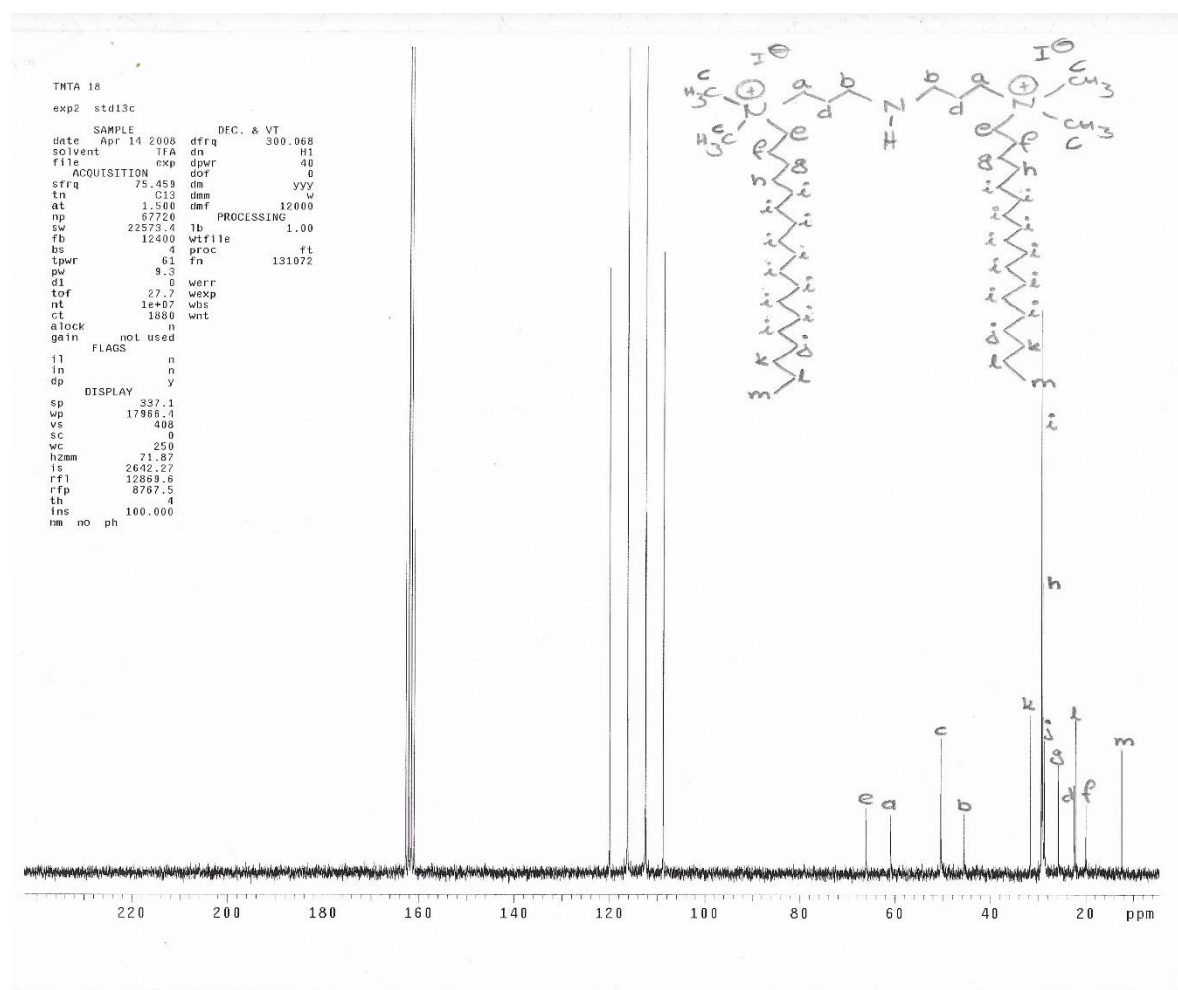

Supplement: molecules-25-04054-s001.pdf [file molecules-25-04054-s001.pdf]
